# Supplementary figures and images for: The CryoEM structure of the Saccharomyces cerevisiae ribosome maturation factor Rea1
Source: eLife journal article supplement (doi:10.7554/elife.39163), 2018-11-21

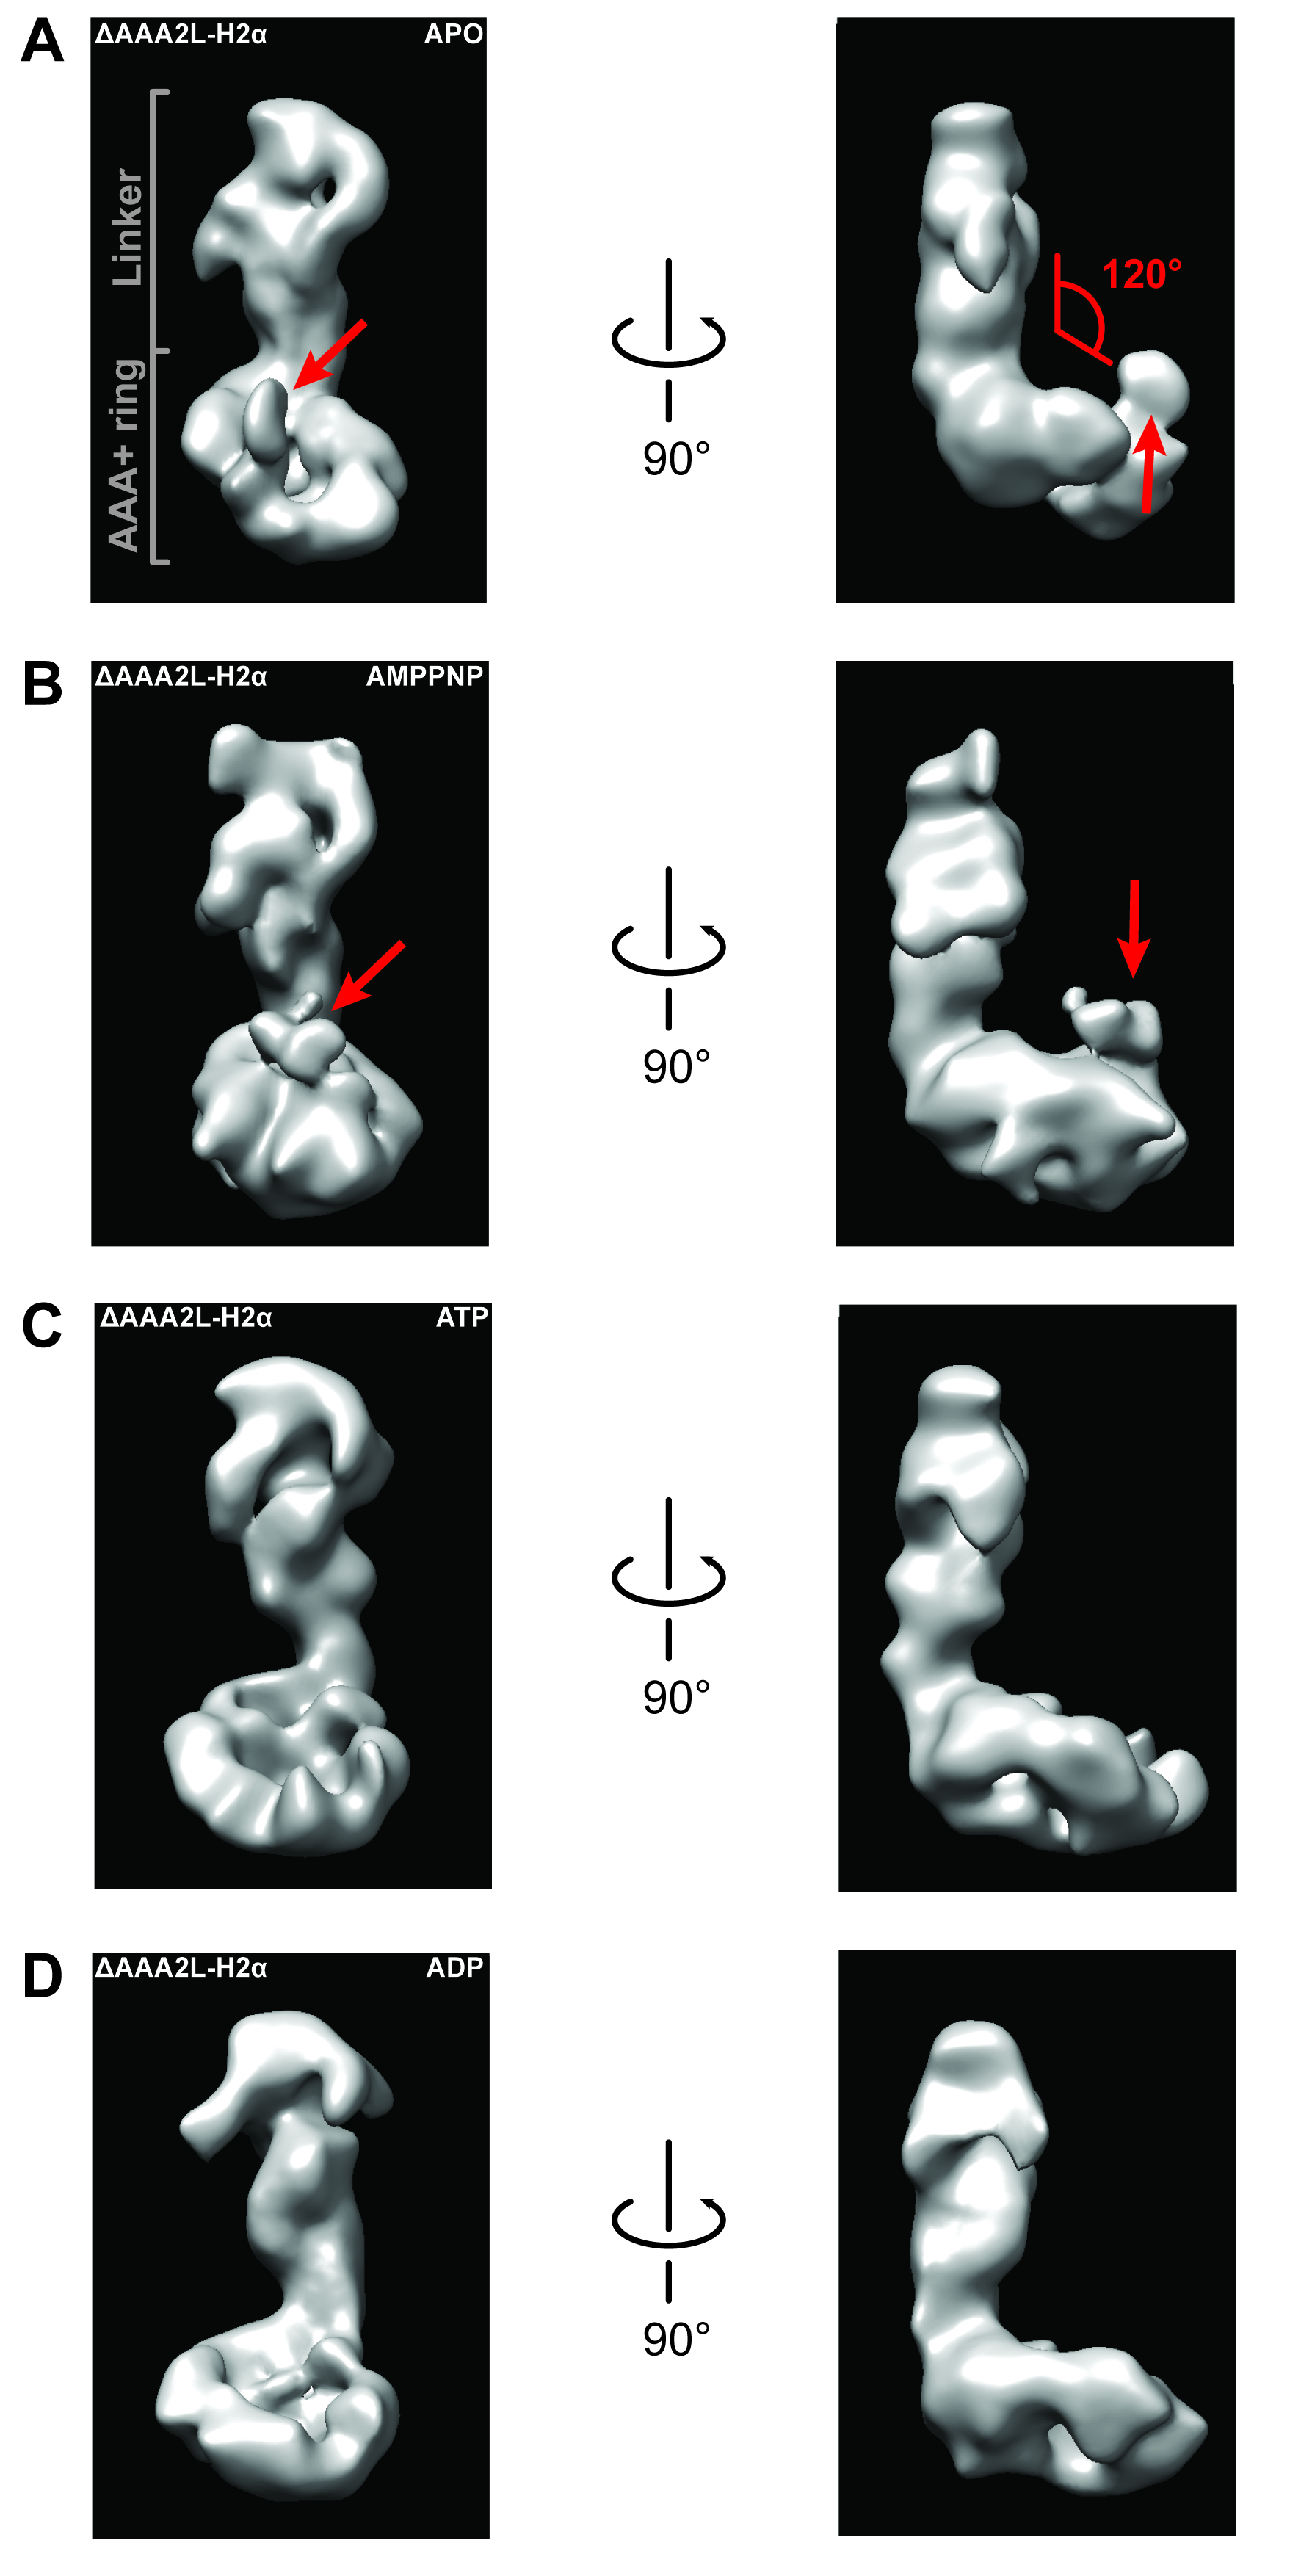

Supplement: supp [file elife-39163-supp-v1.zip › elife_poa_e39163_Figure_4_figure_supplement_3.tif]

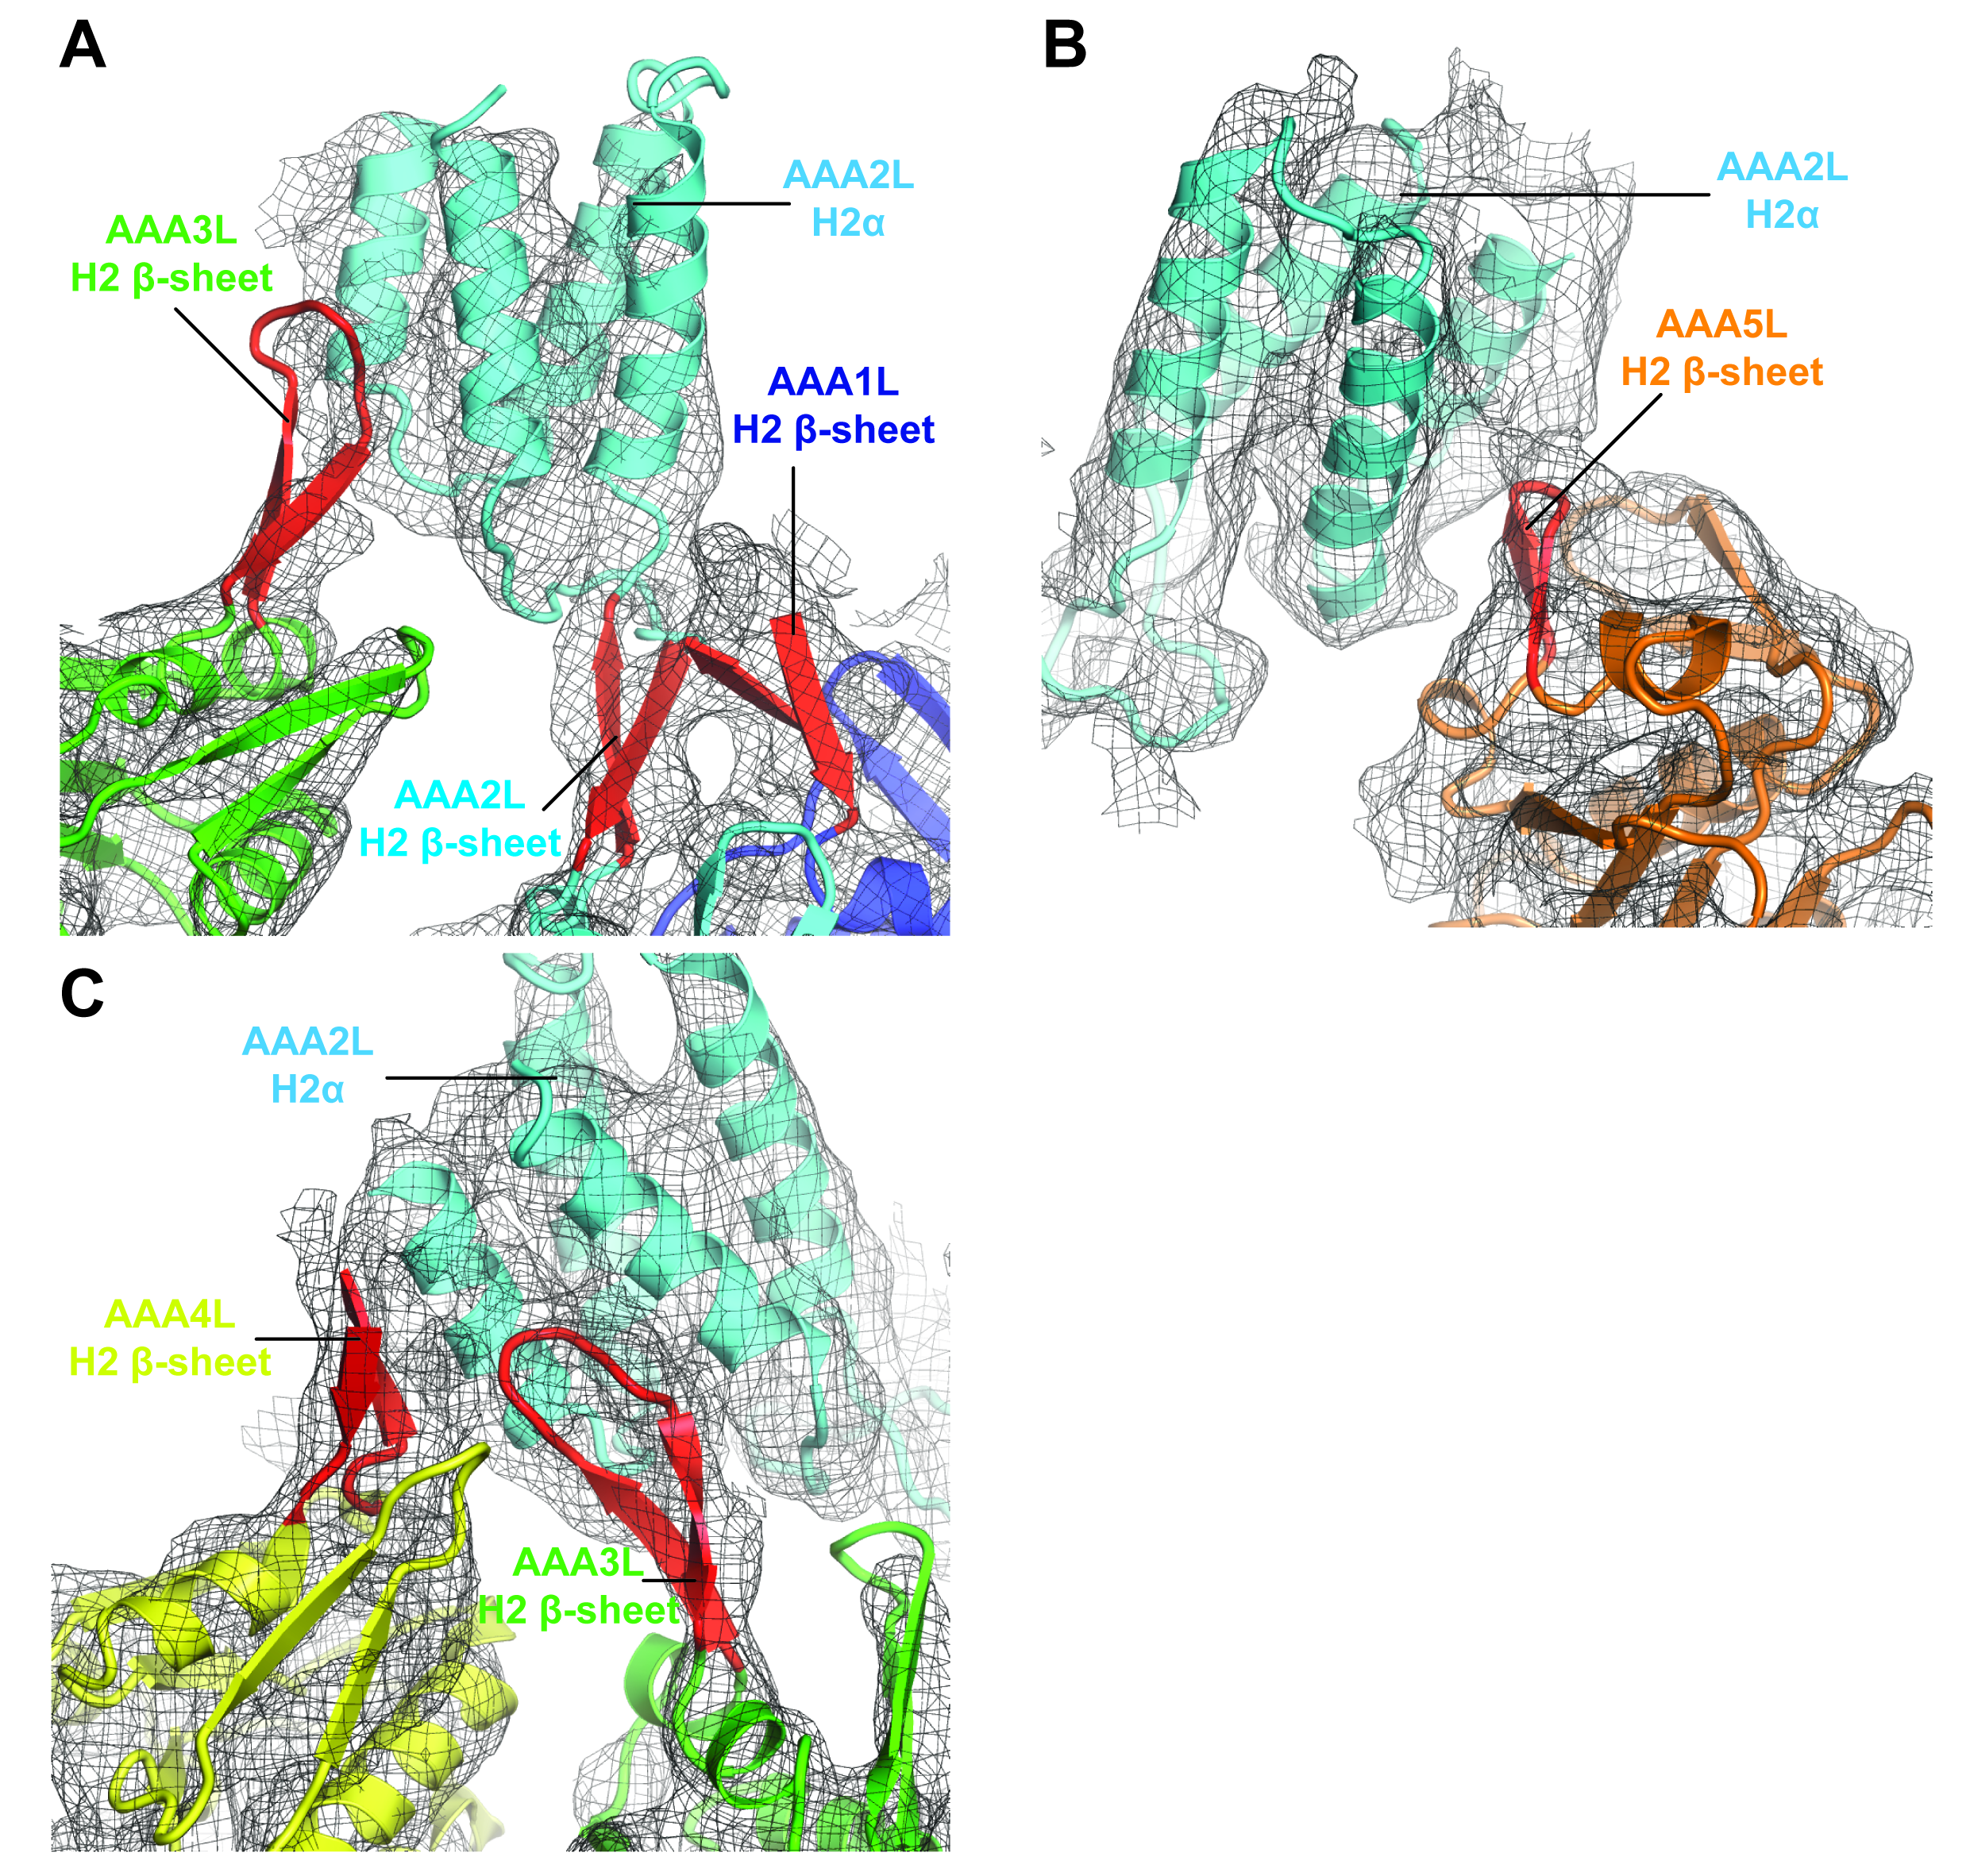

Supplement: supp [file elife-39163-supp-v1.zip › elife_poa_e39163_Figure_2_figure_supplement_1.tif]

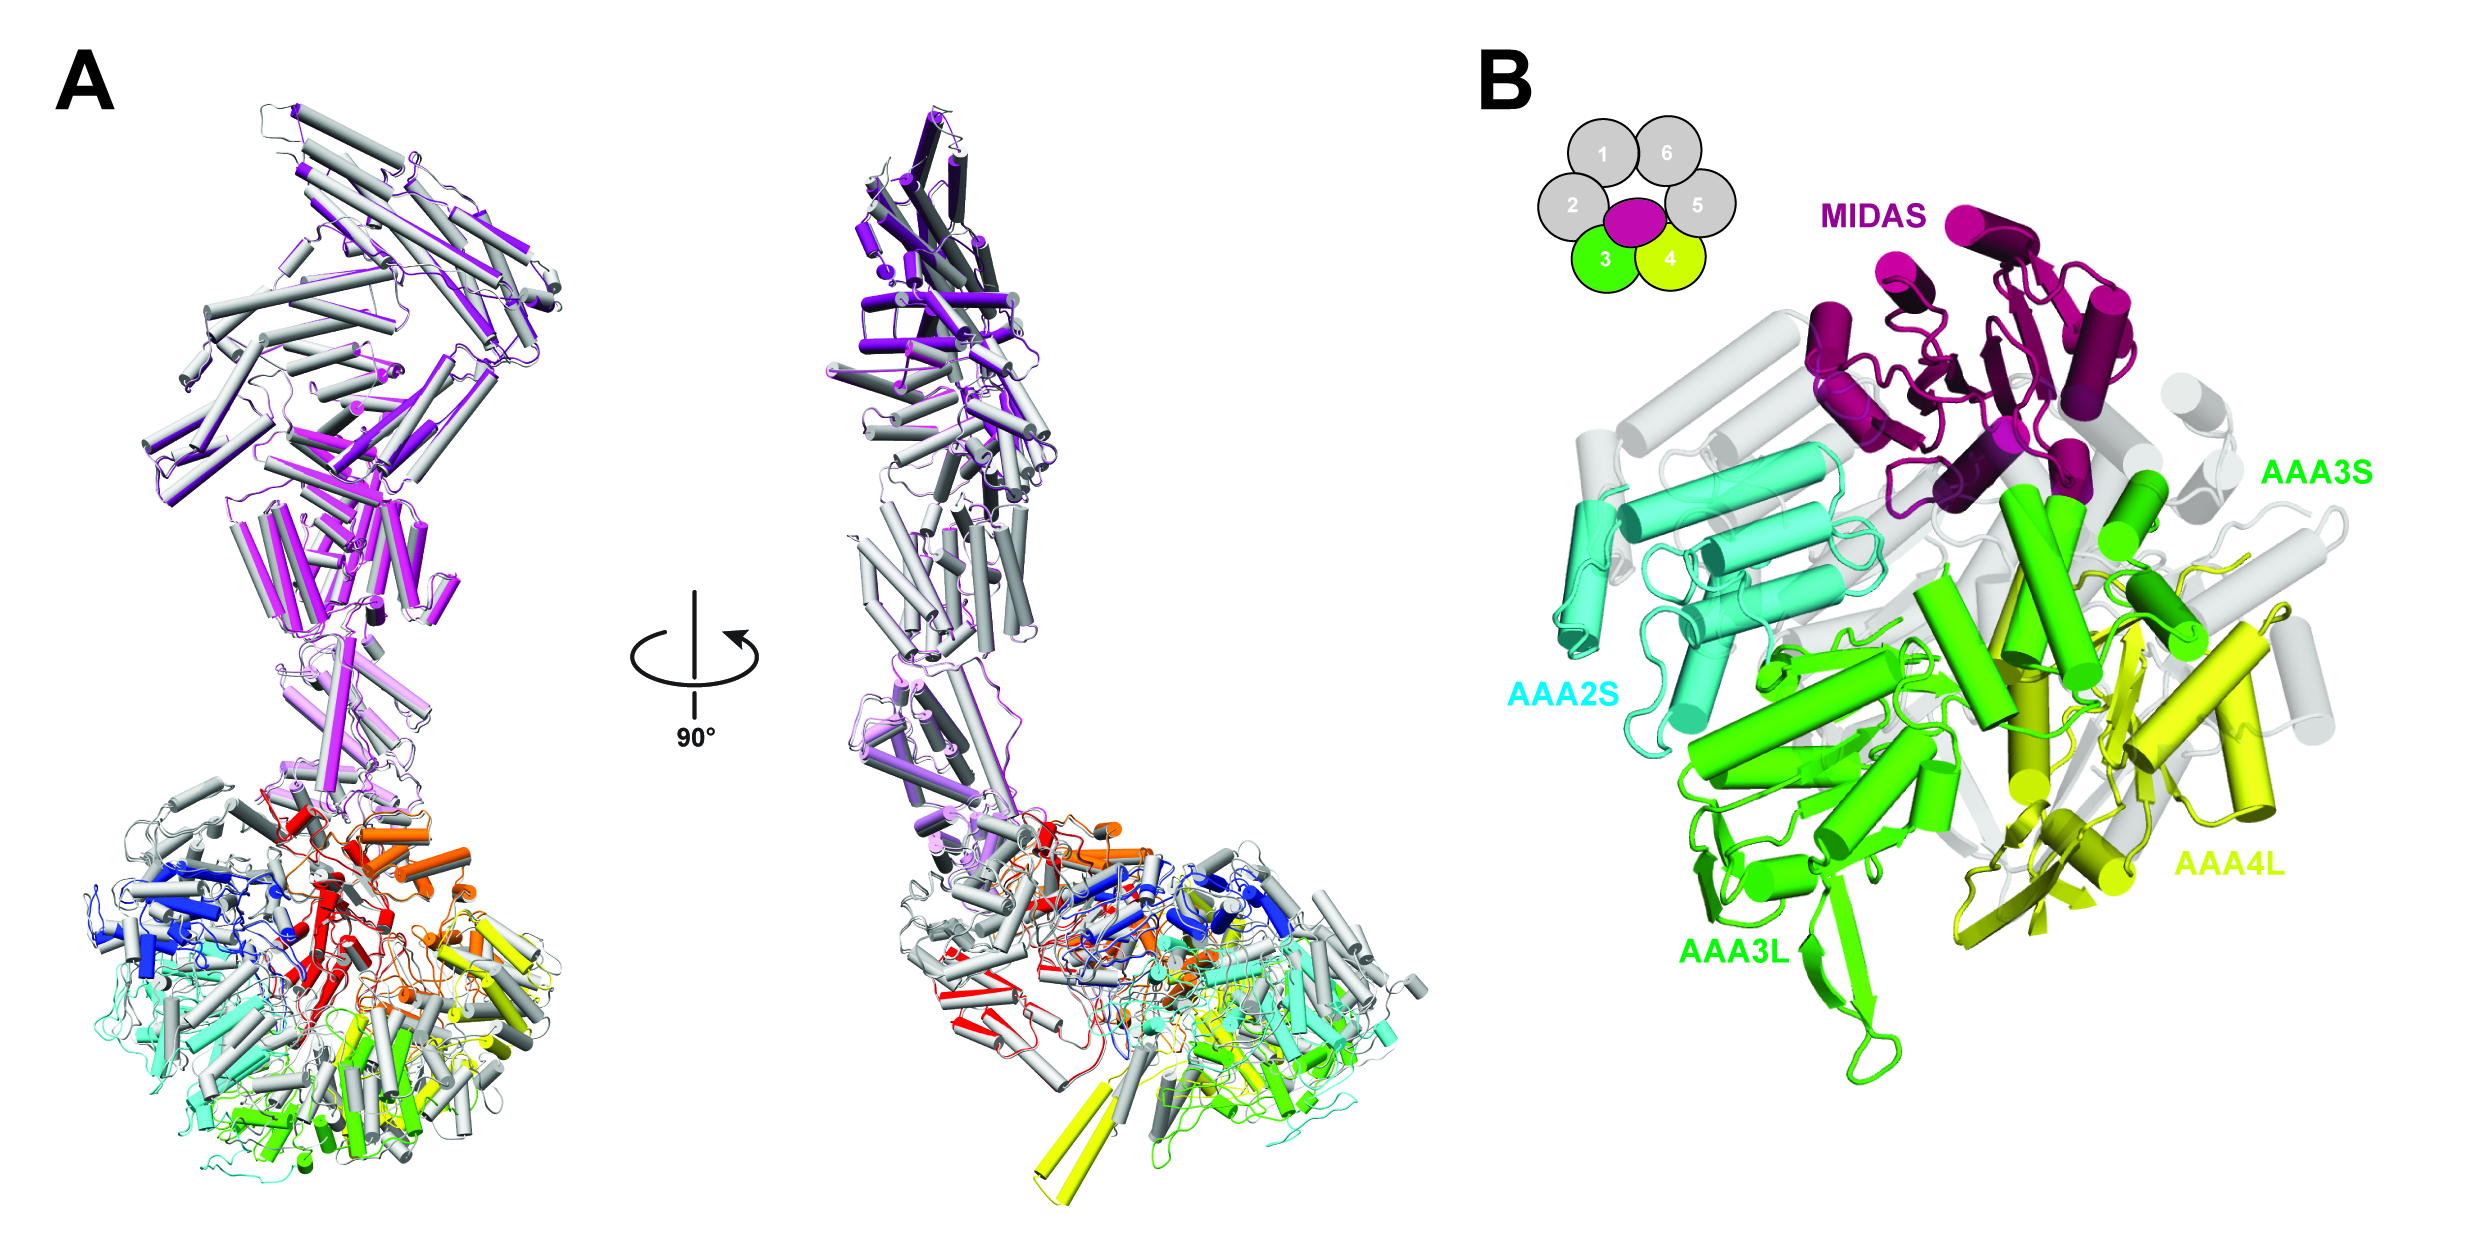

Supplement: supp [file elife-39163-supp-v1.zip › elife_poa_e39163_Figure_4_figure_supplement_6.tif]

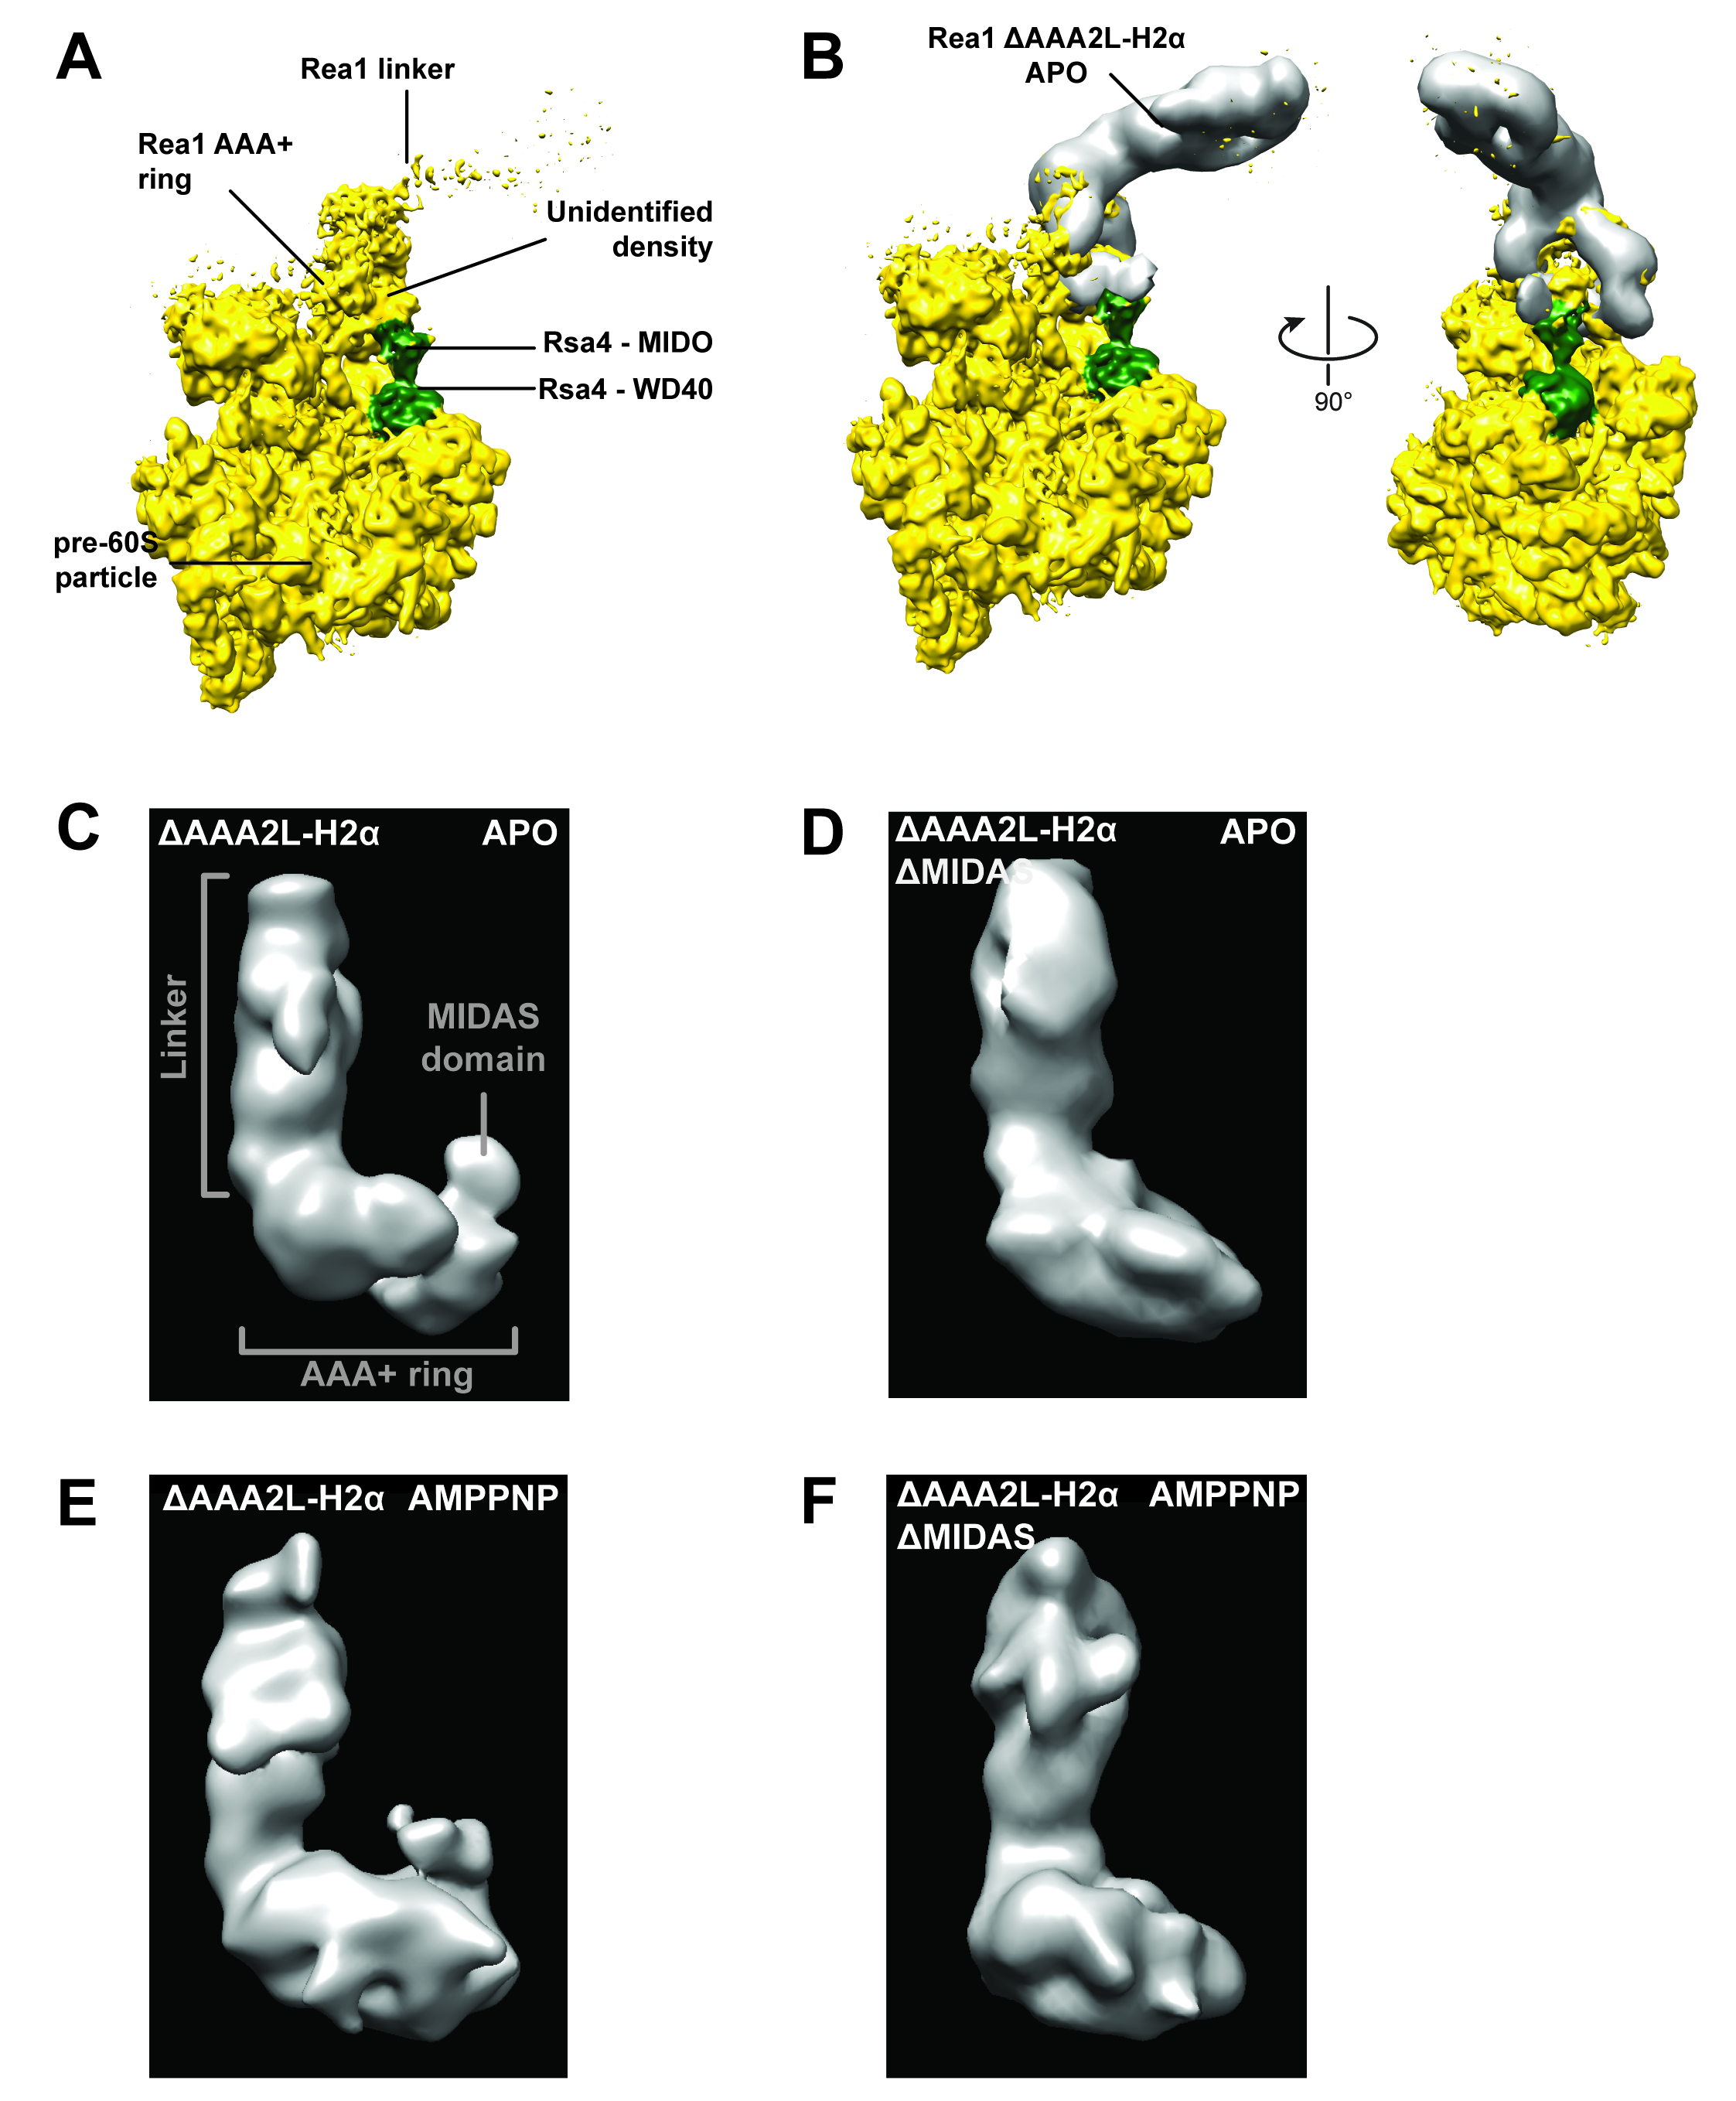

Supplement: supp [file elife-39163-supp-v1.zip › elife_poa_e39163_Figure_4_figure_supplement_4.tif]

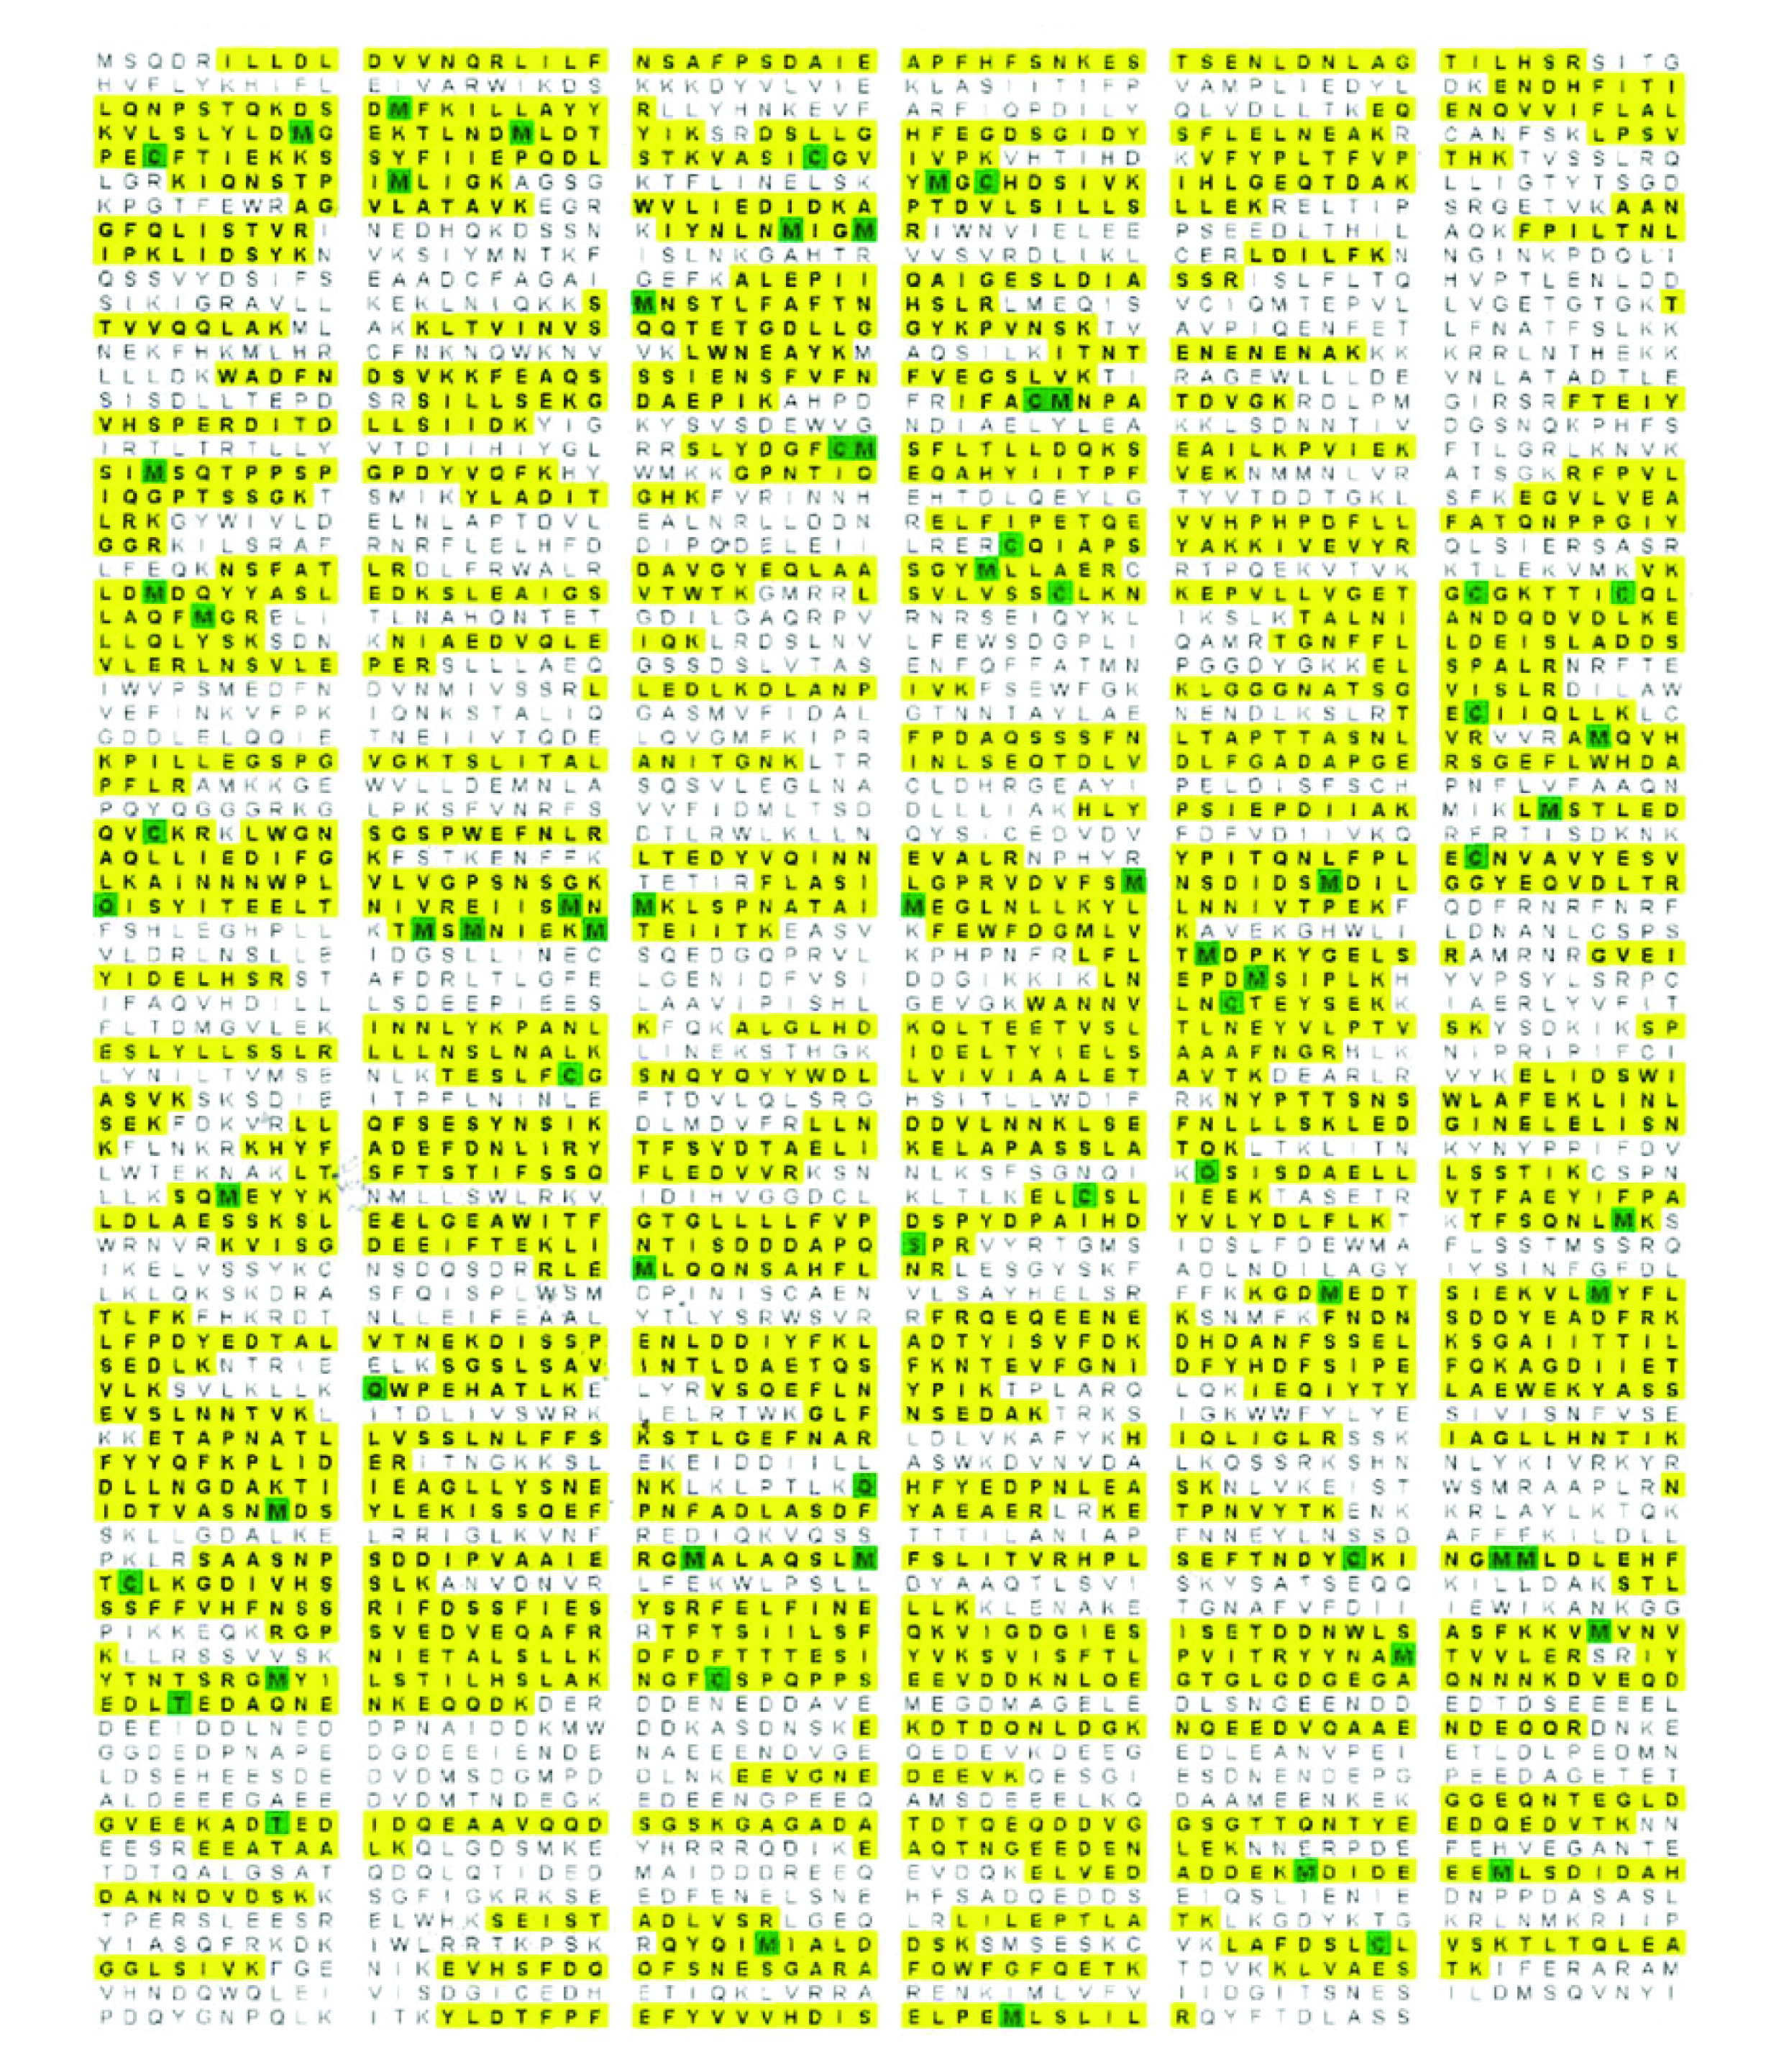

Supplement: supp [file elife-39163-supp-v1.zip › elife_poa_e39163_Figure_1_figure_supplement_3.tif]

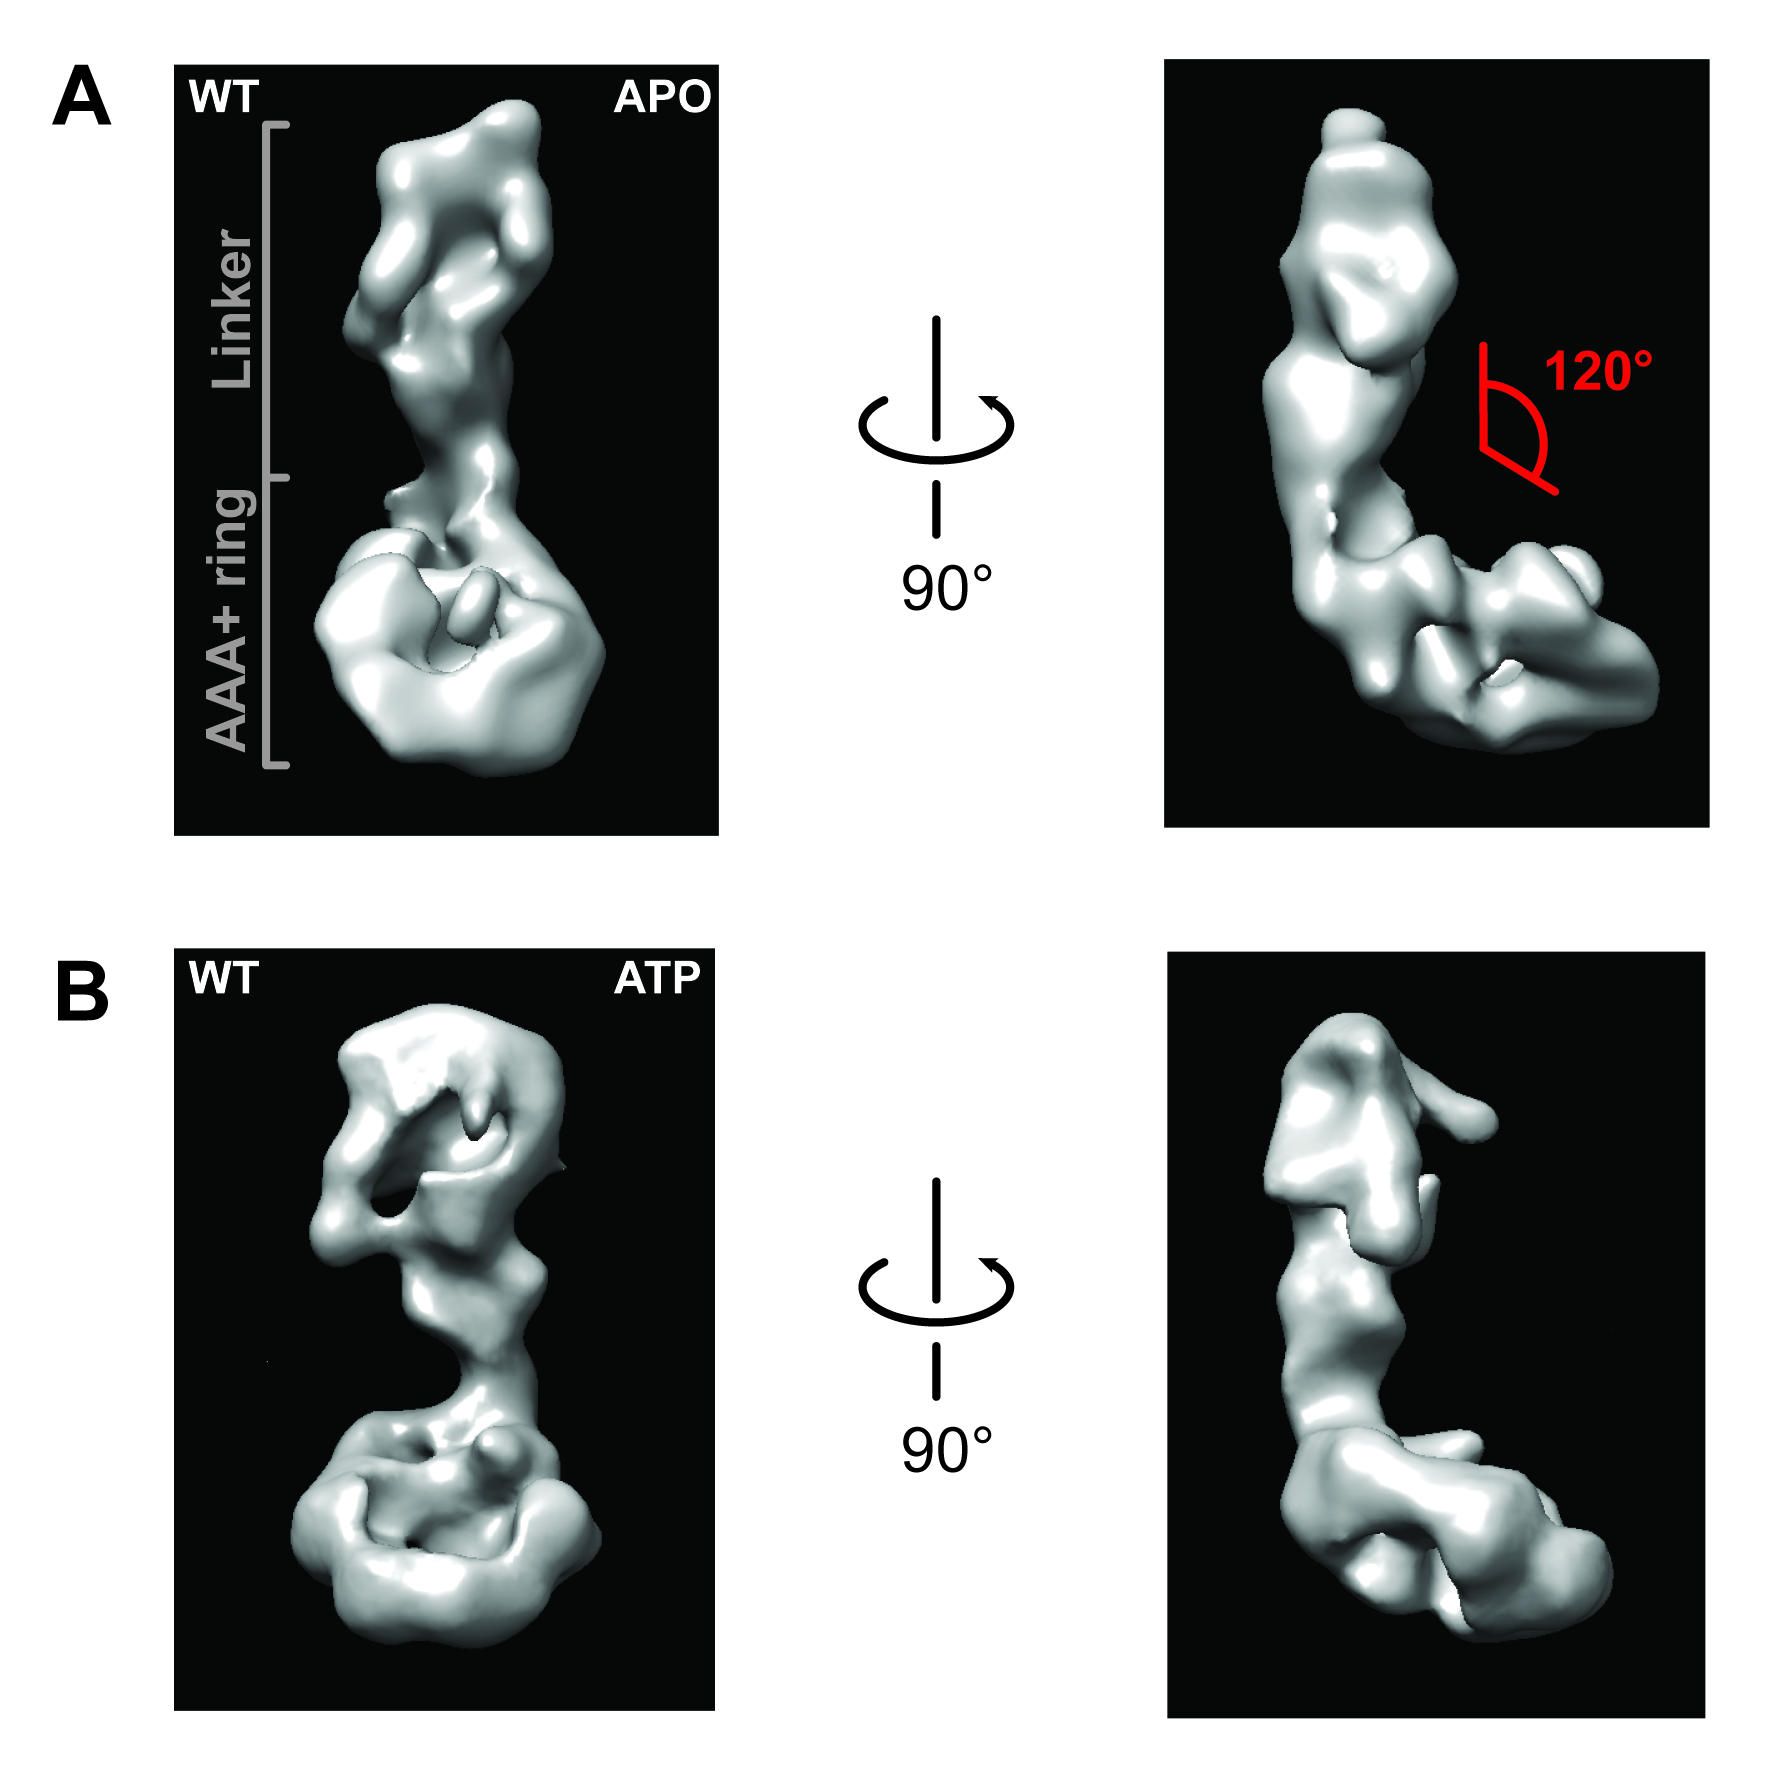

Supplement: supp [file elife-39163-supp-v1.zip › elife_poa_e39163_Figure_4_figure_supplement_2.tif]

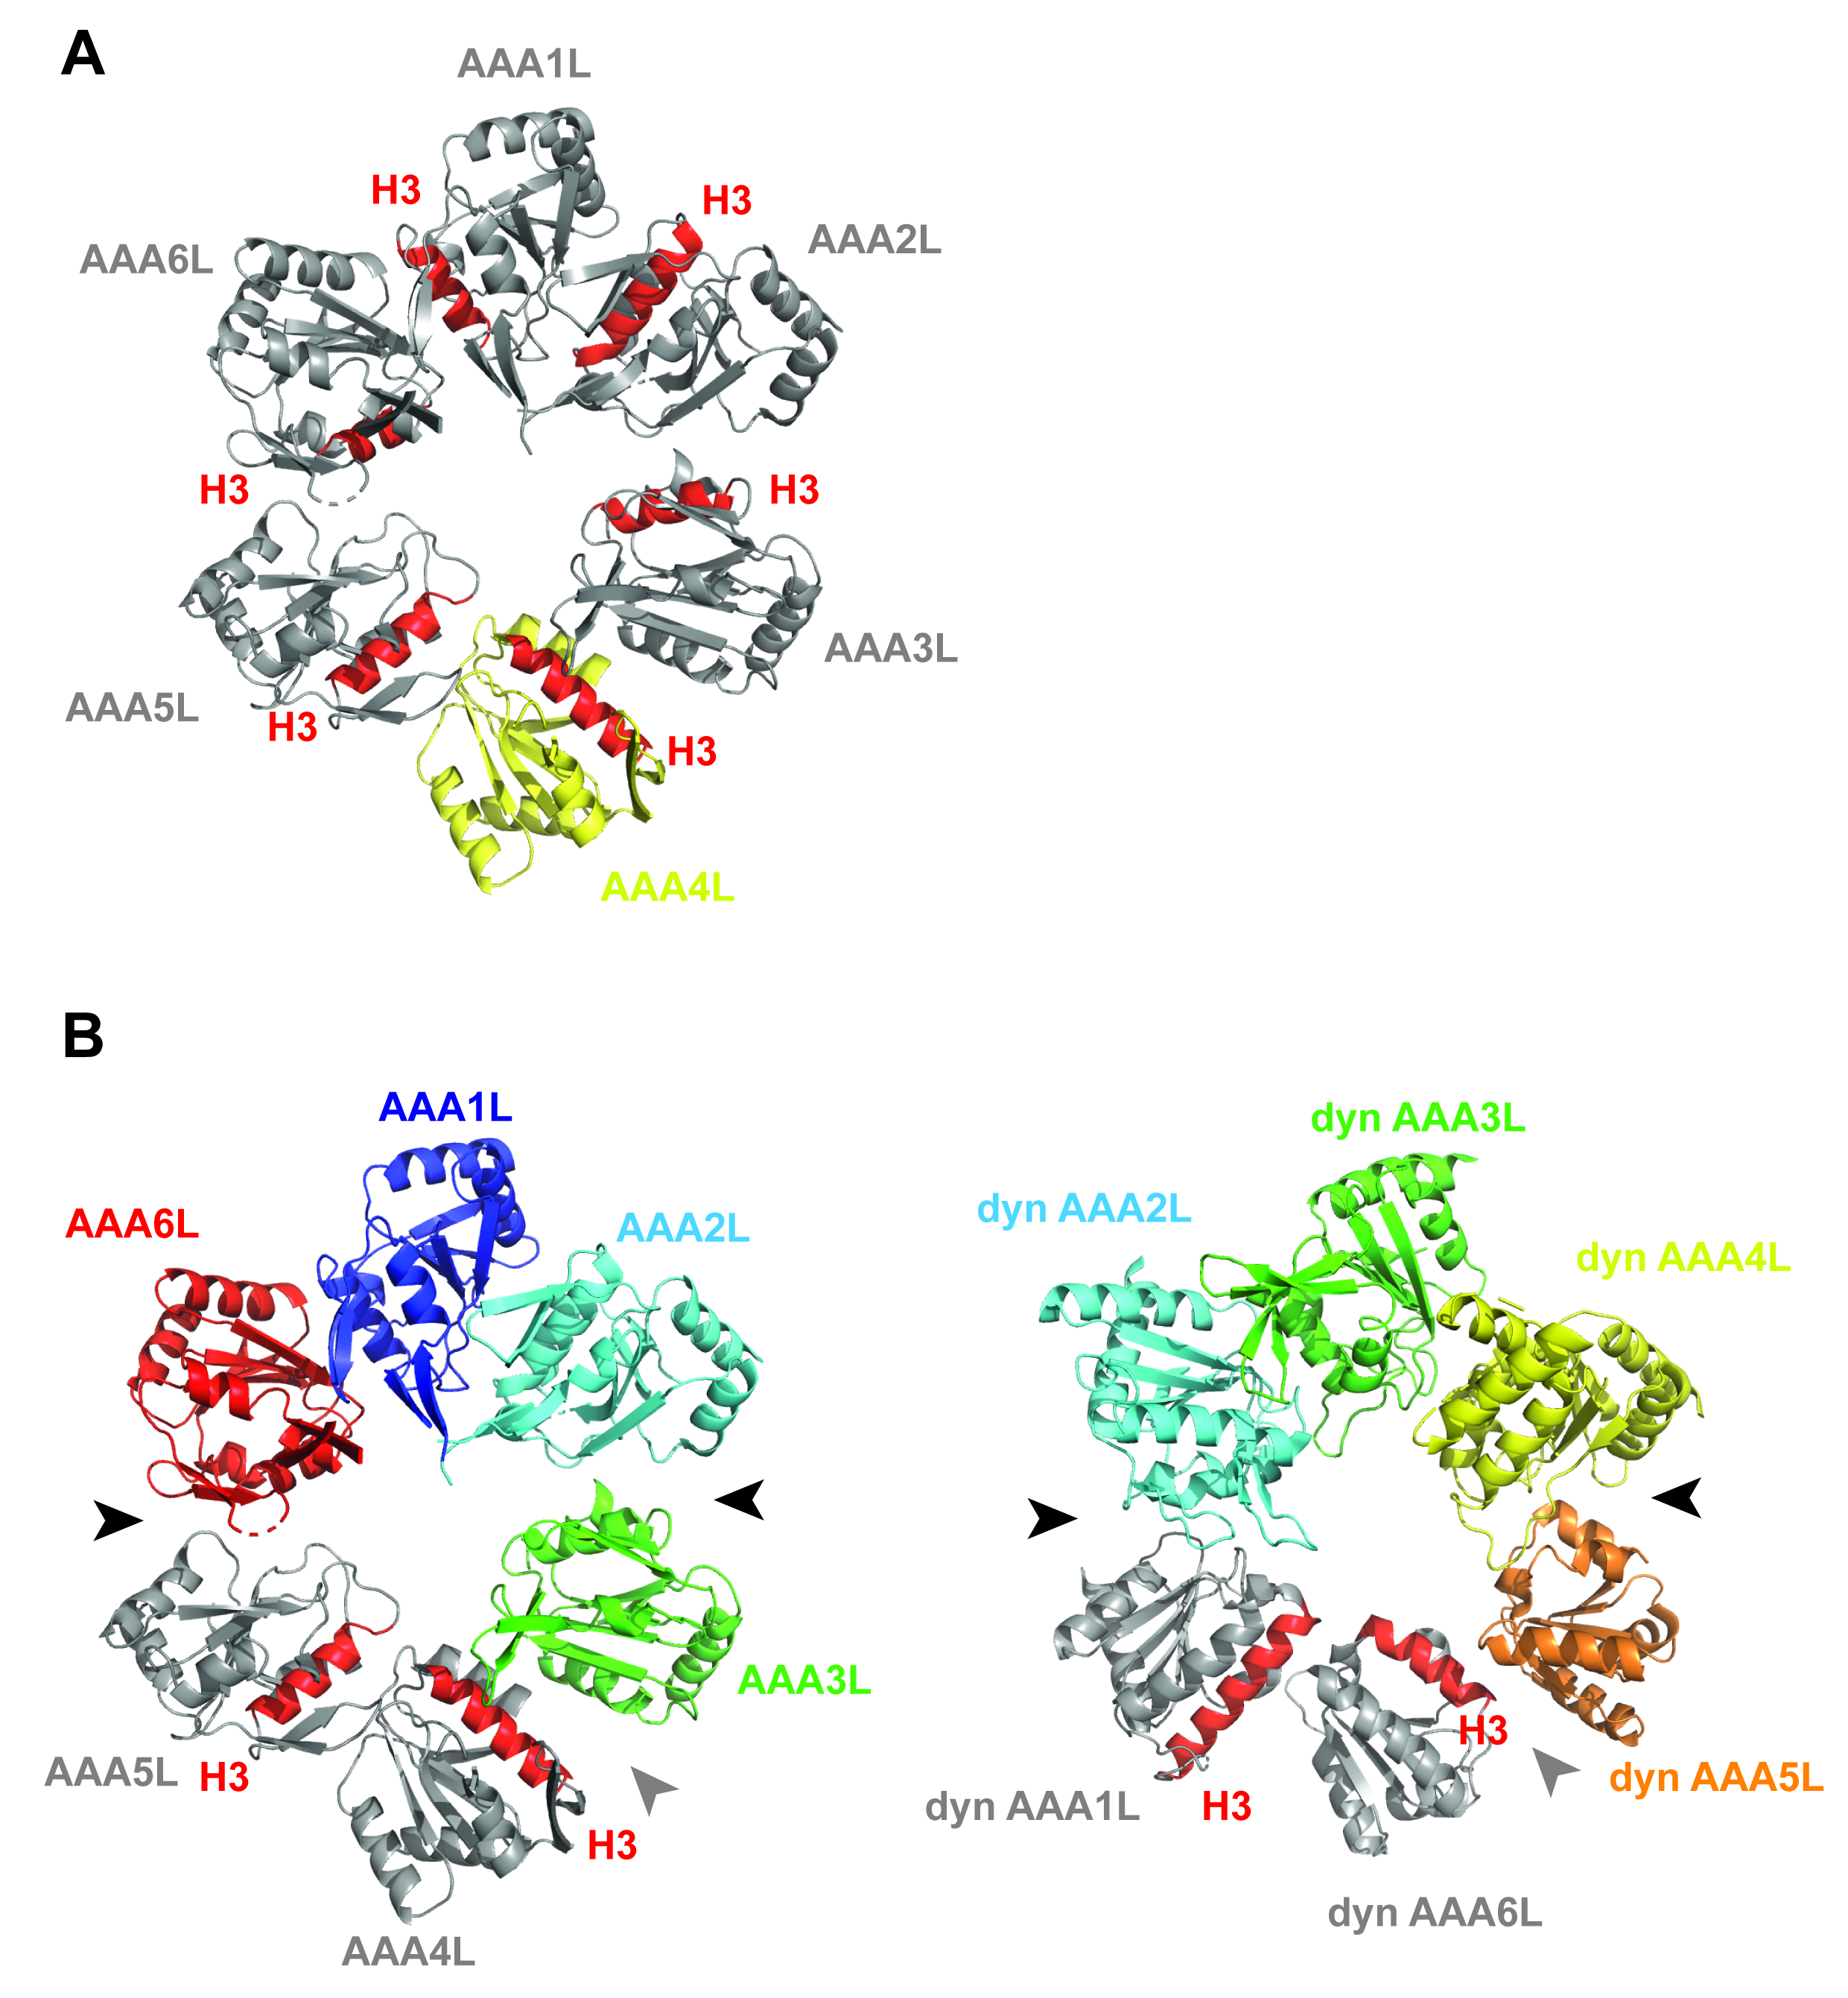

Supplement: supp [file elife-39163-supp-v1.zip › elife_poa_e39163_Figure_2_figure_supplement_2.tif]

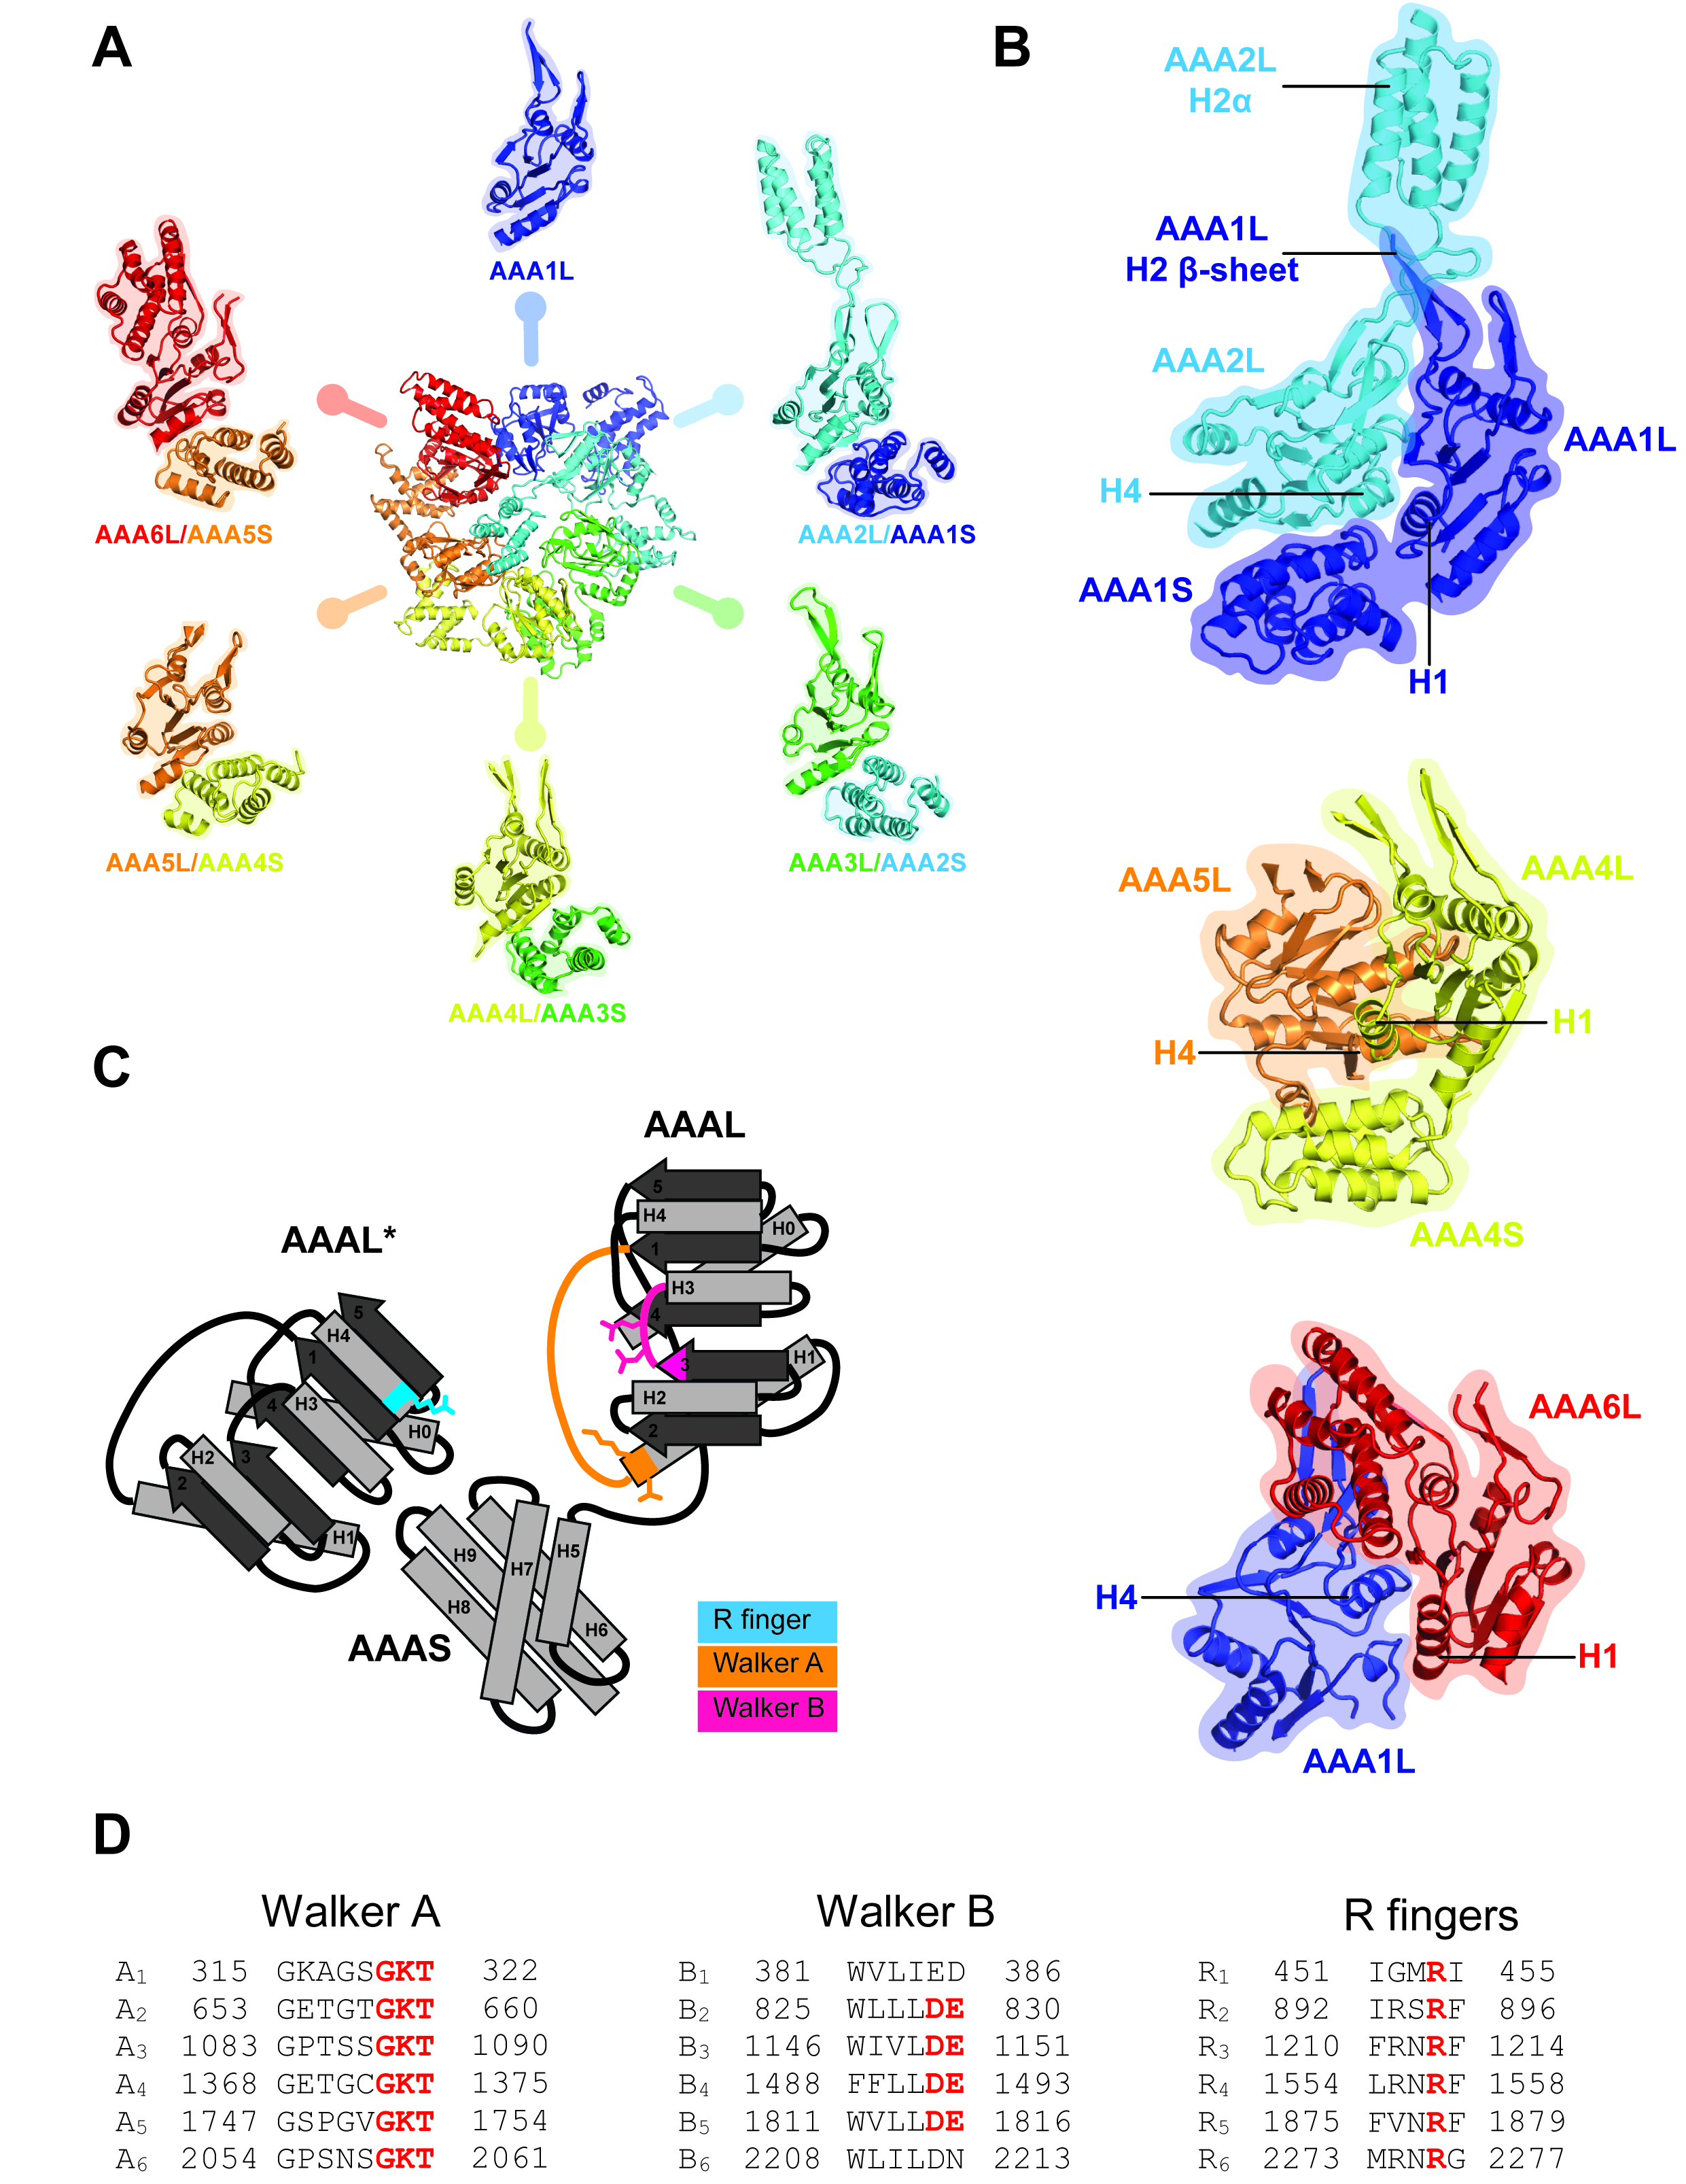

Supplement: supp [file elife-39163-supp-v1.zip › elife_poa_e39163_Figure_1_figure_supplement_5.tif]

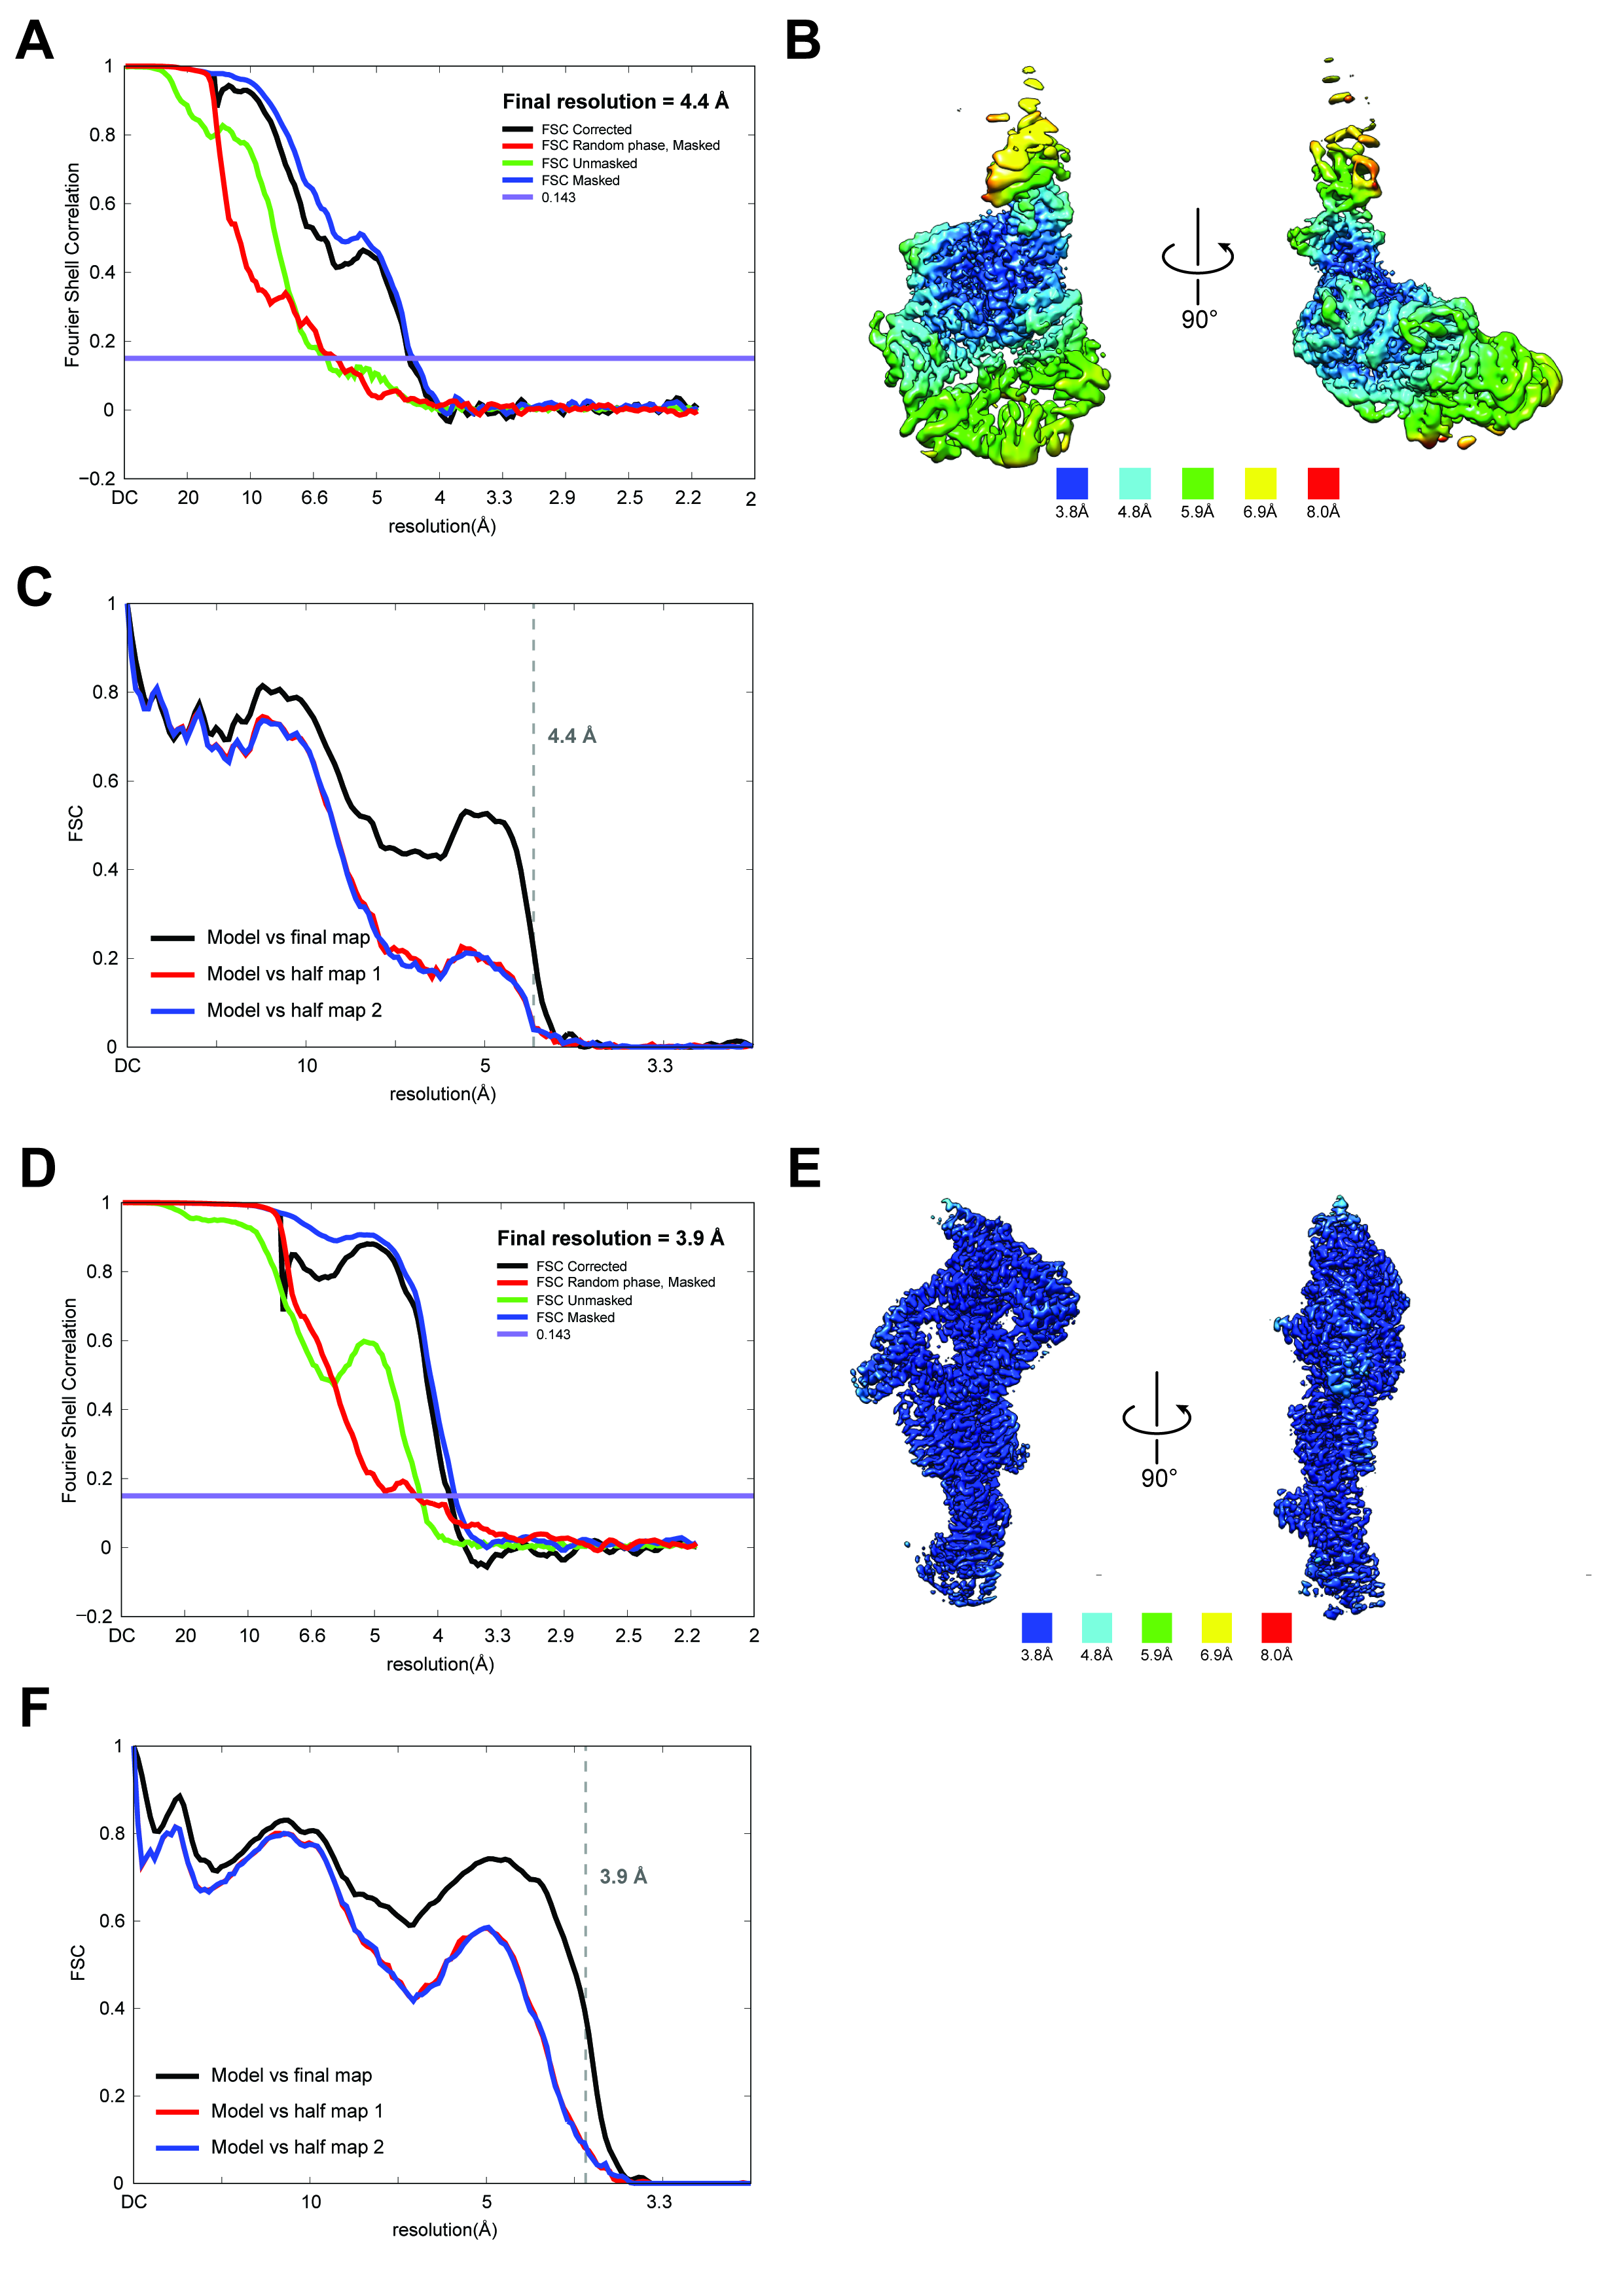

Supplement: supp [file elife-39163-supp-v1.zip › elife_poa_e39163_Figure_1_figure_supplement_1.tif]

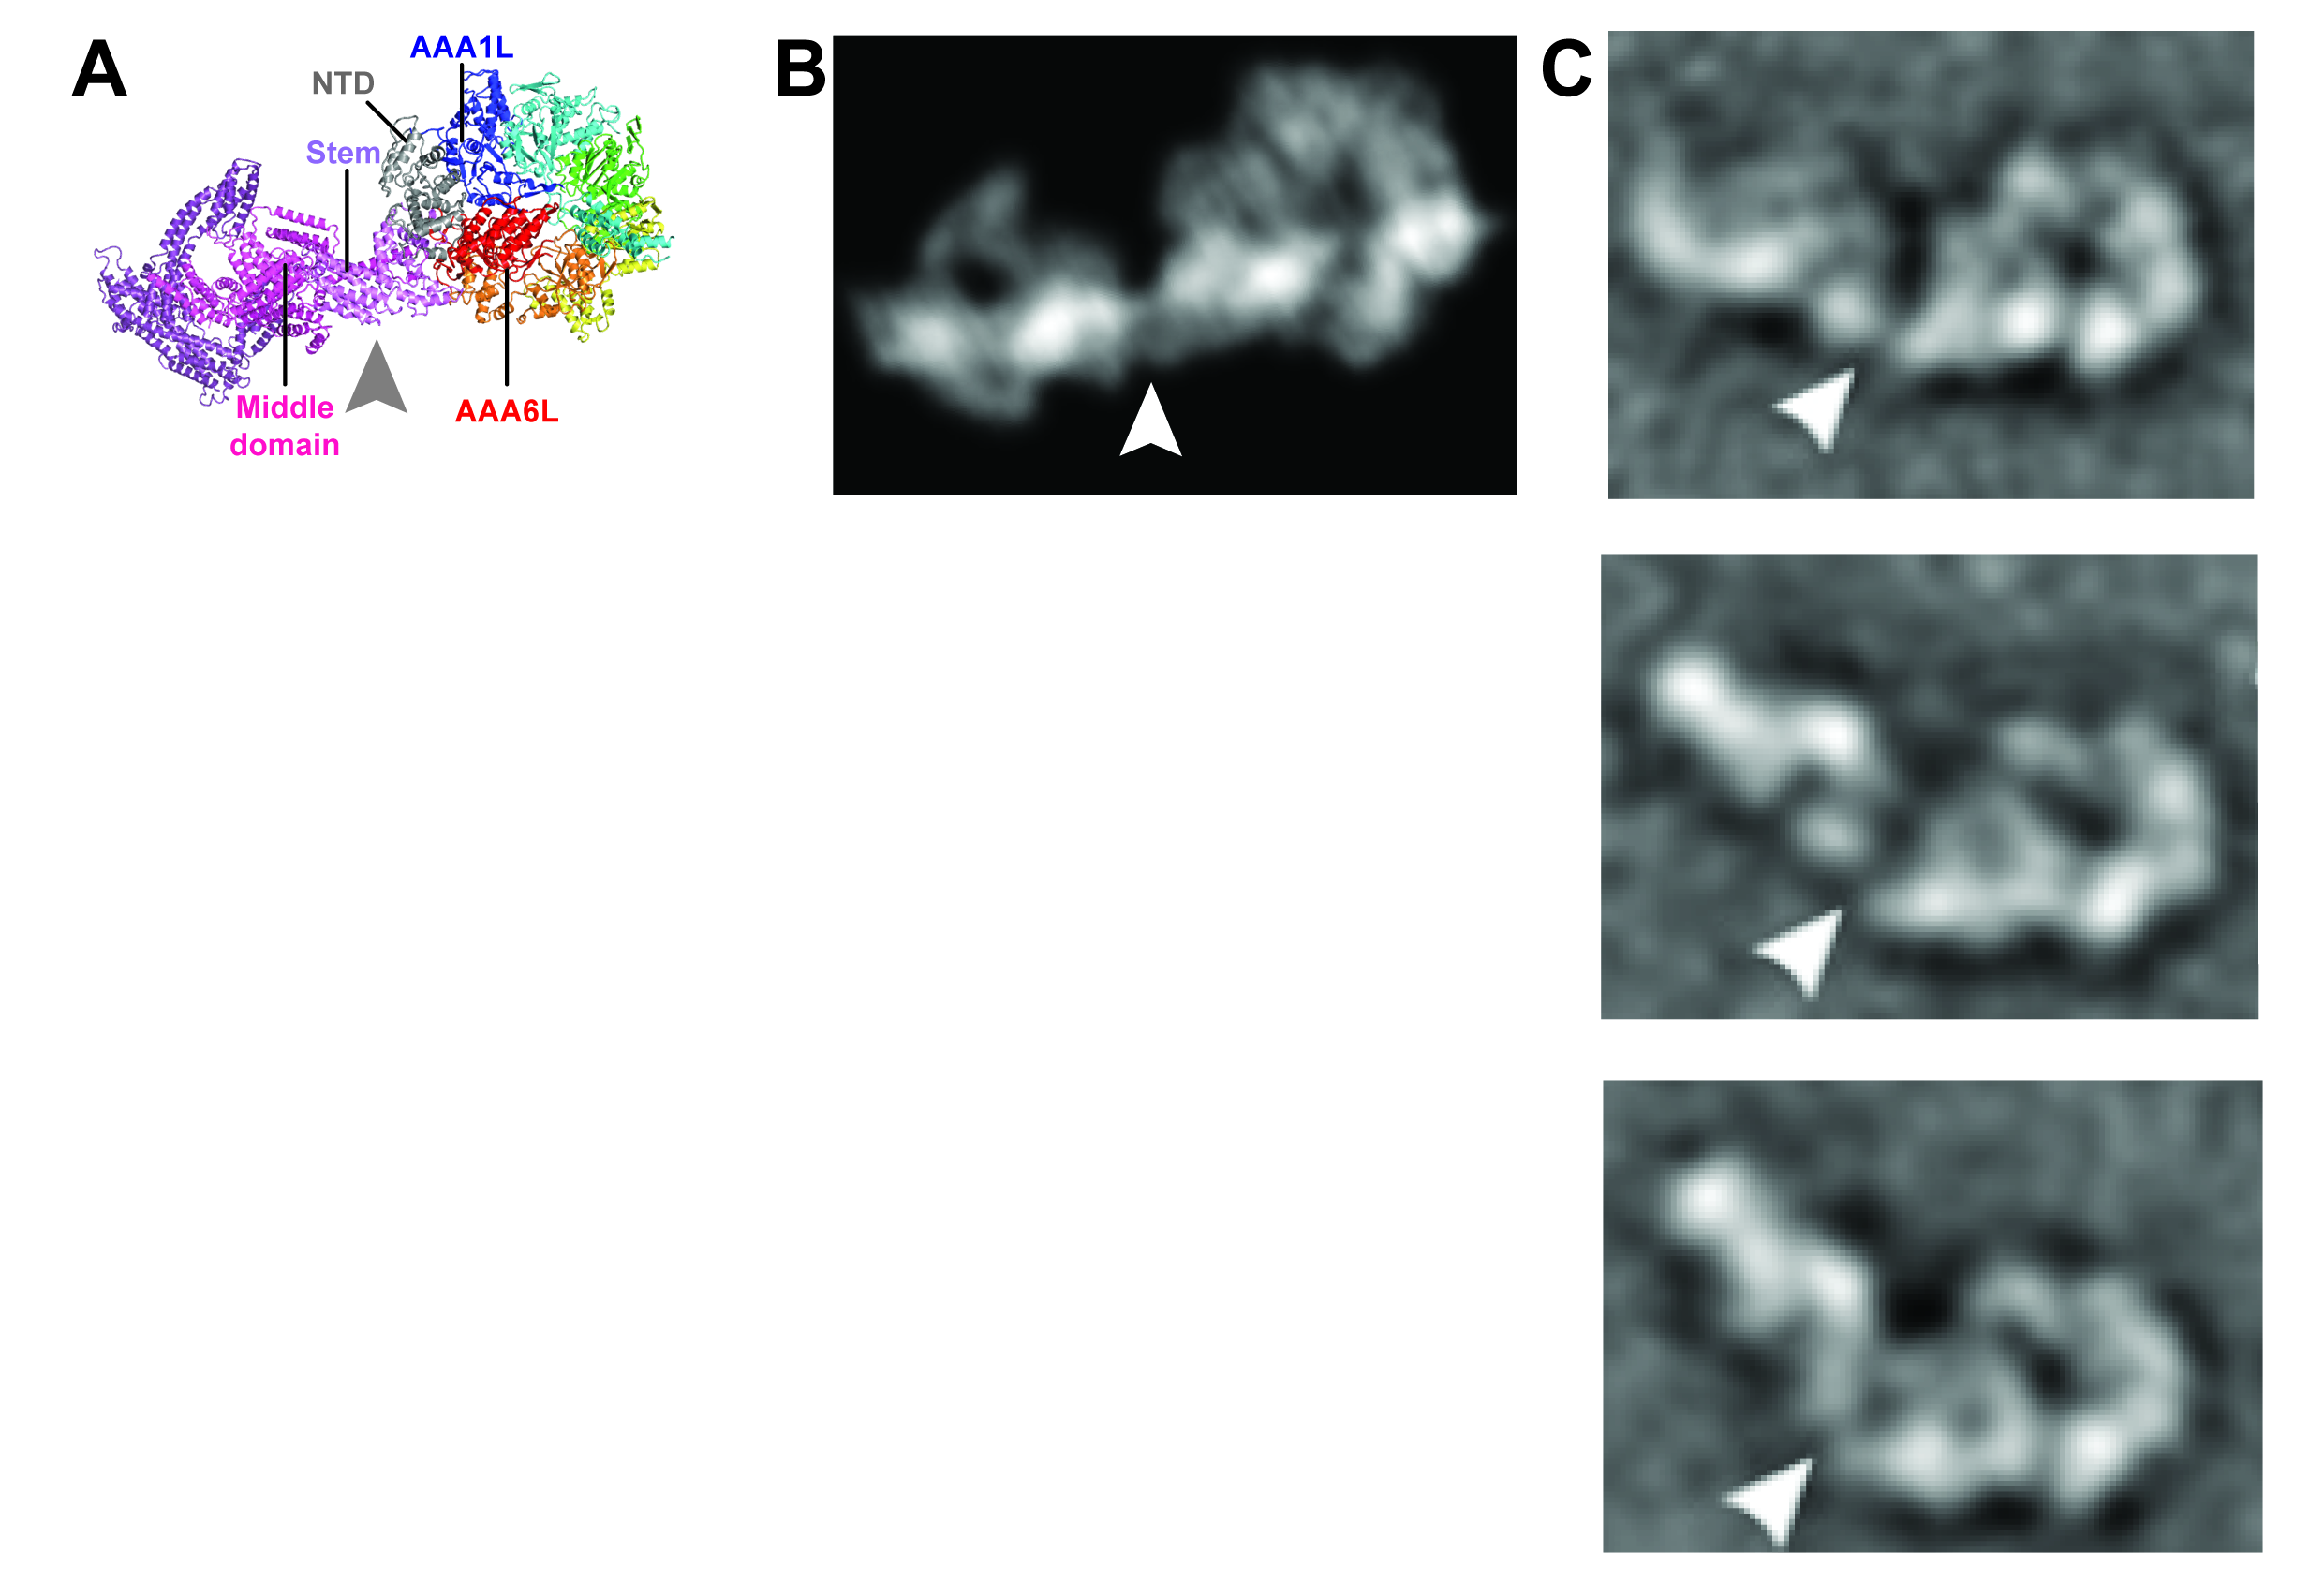

Supplement: supp [file elife-39163-supp-v1.zip › elife_poa_e39163_Figure_3_figure_supplement_1.tif]

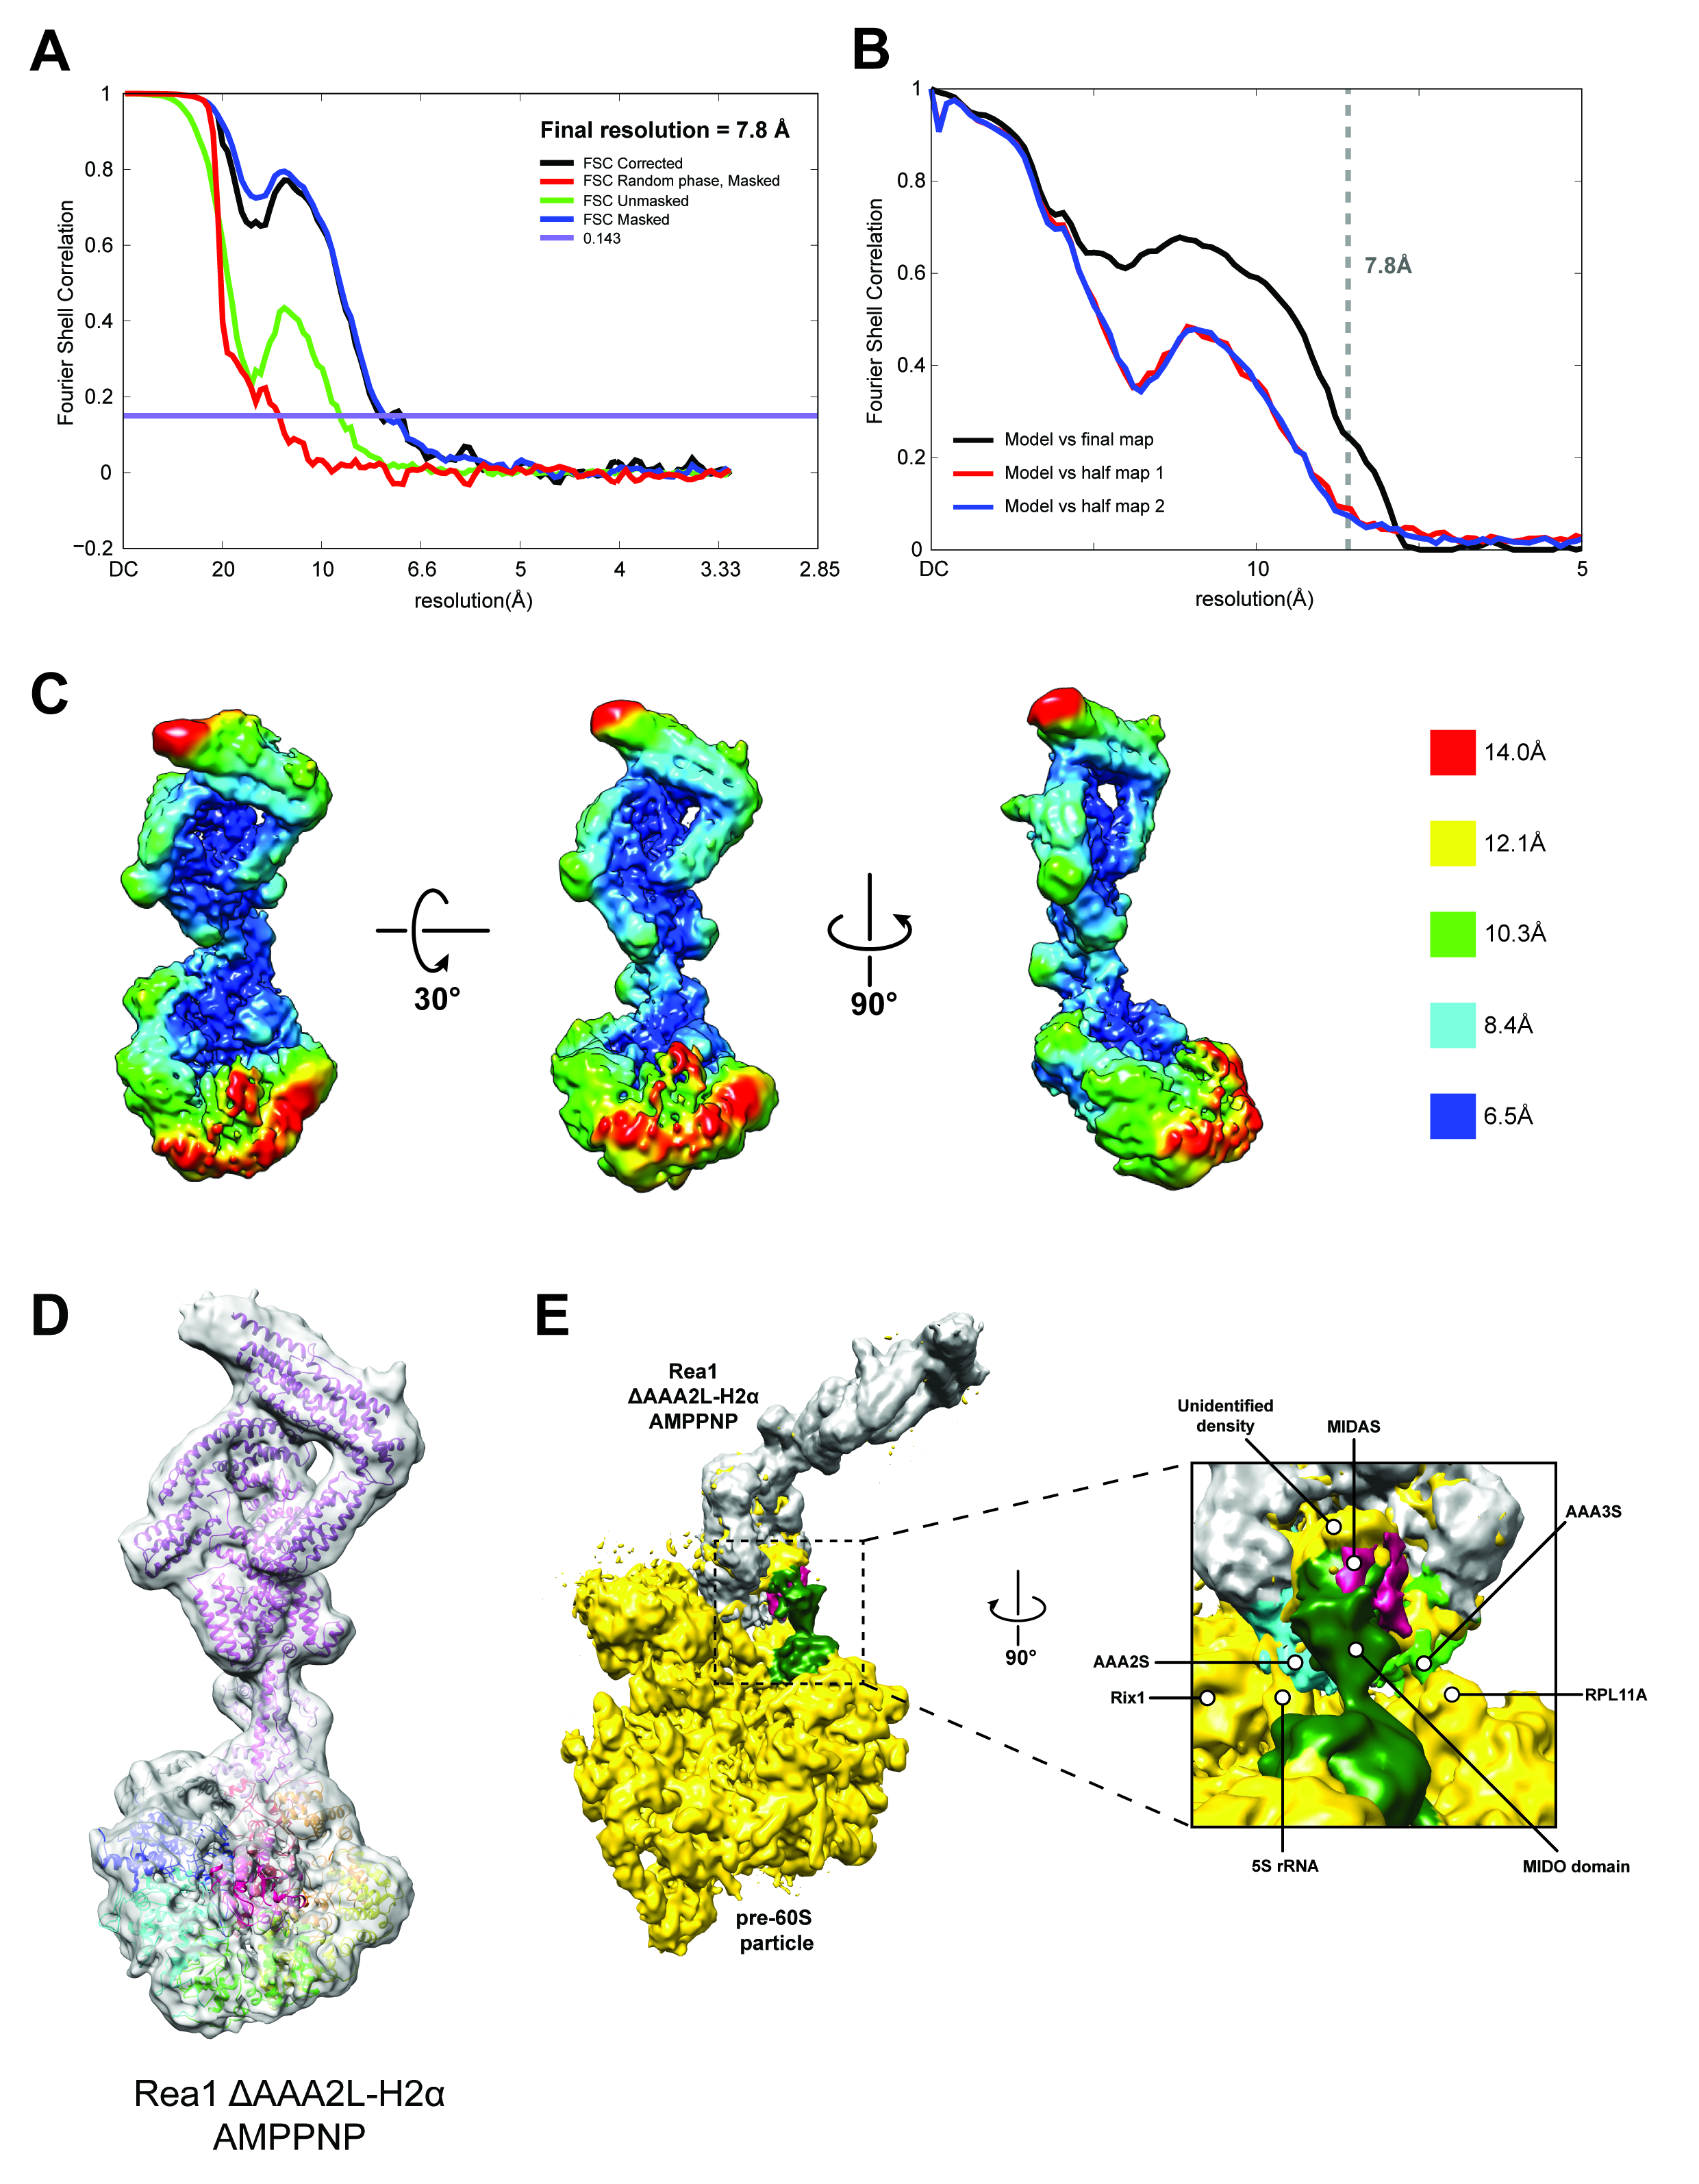

Supplement: supp [file elife-39163-supp-v1.zip › elife_poa_e39163_Figure_4_figure_supplement_5.tif]

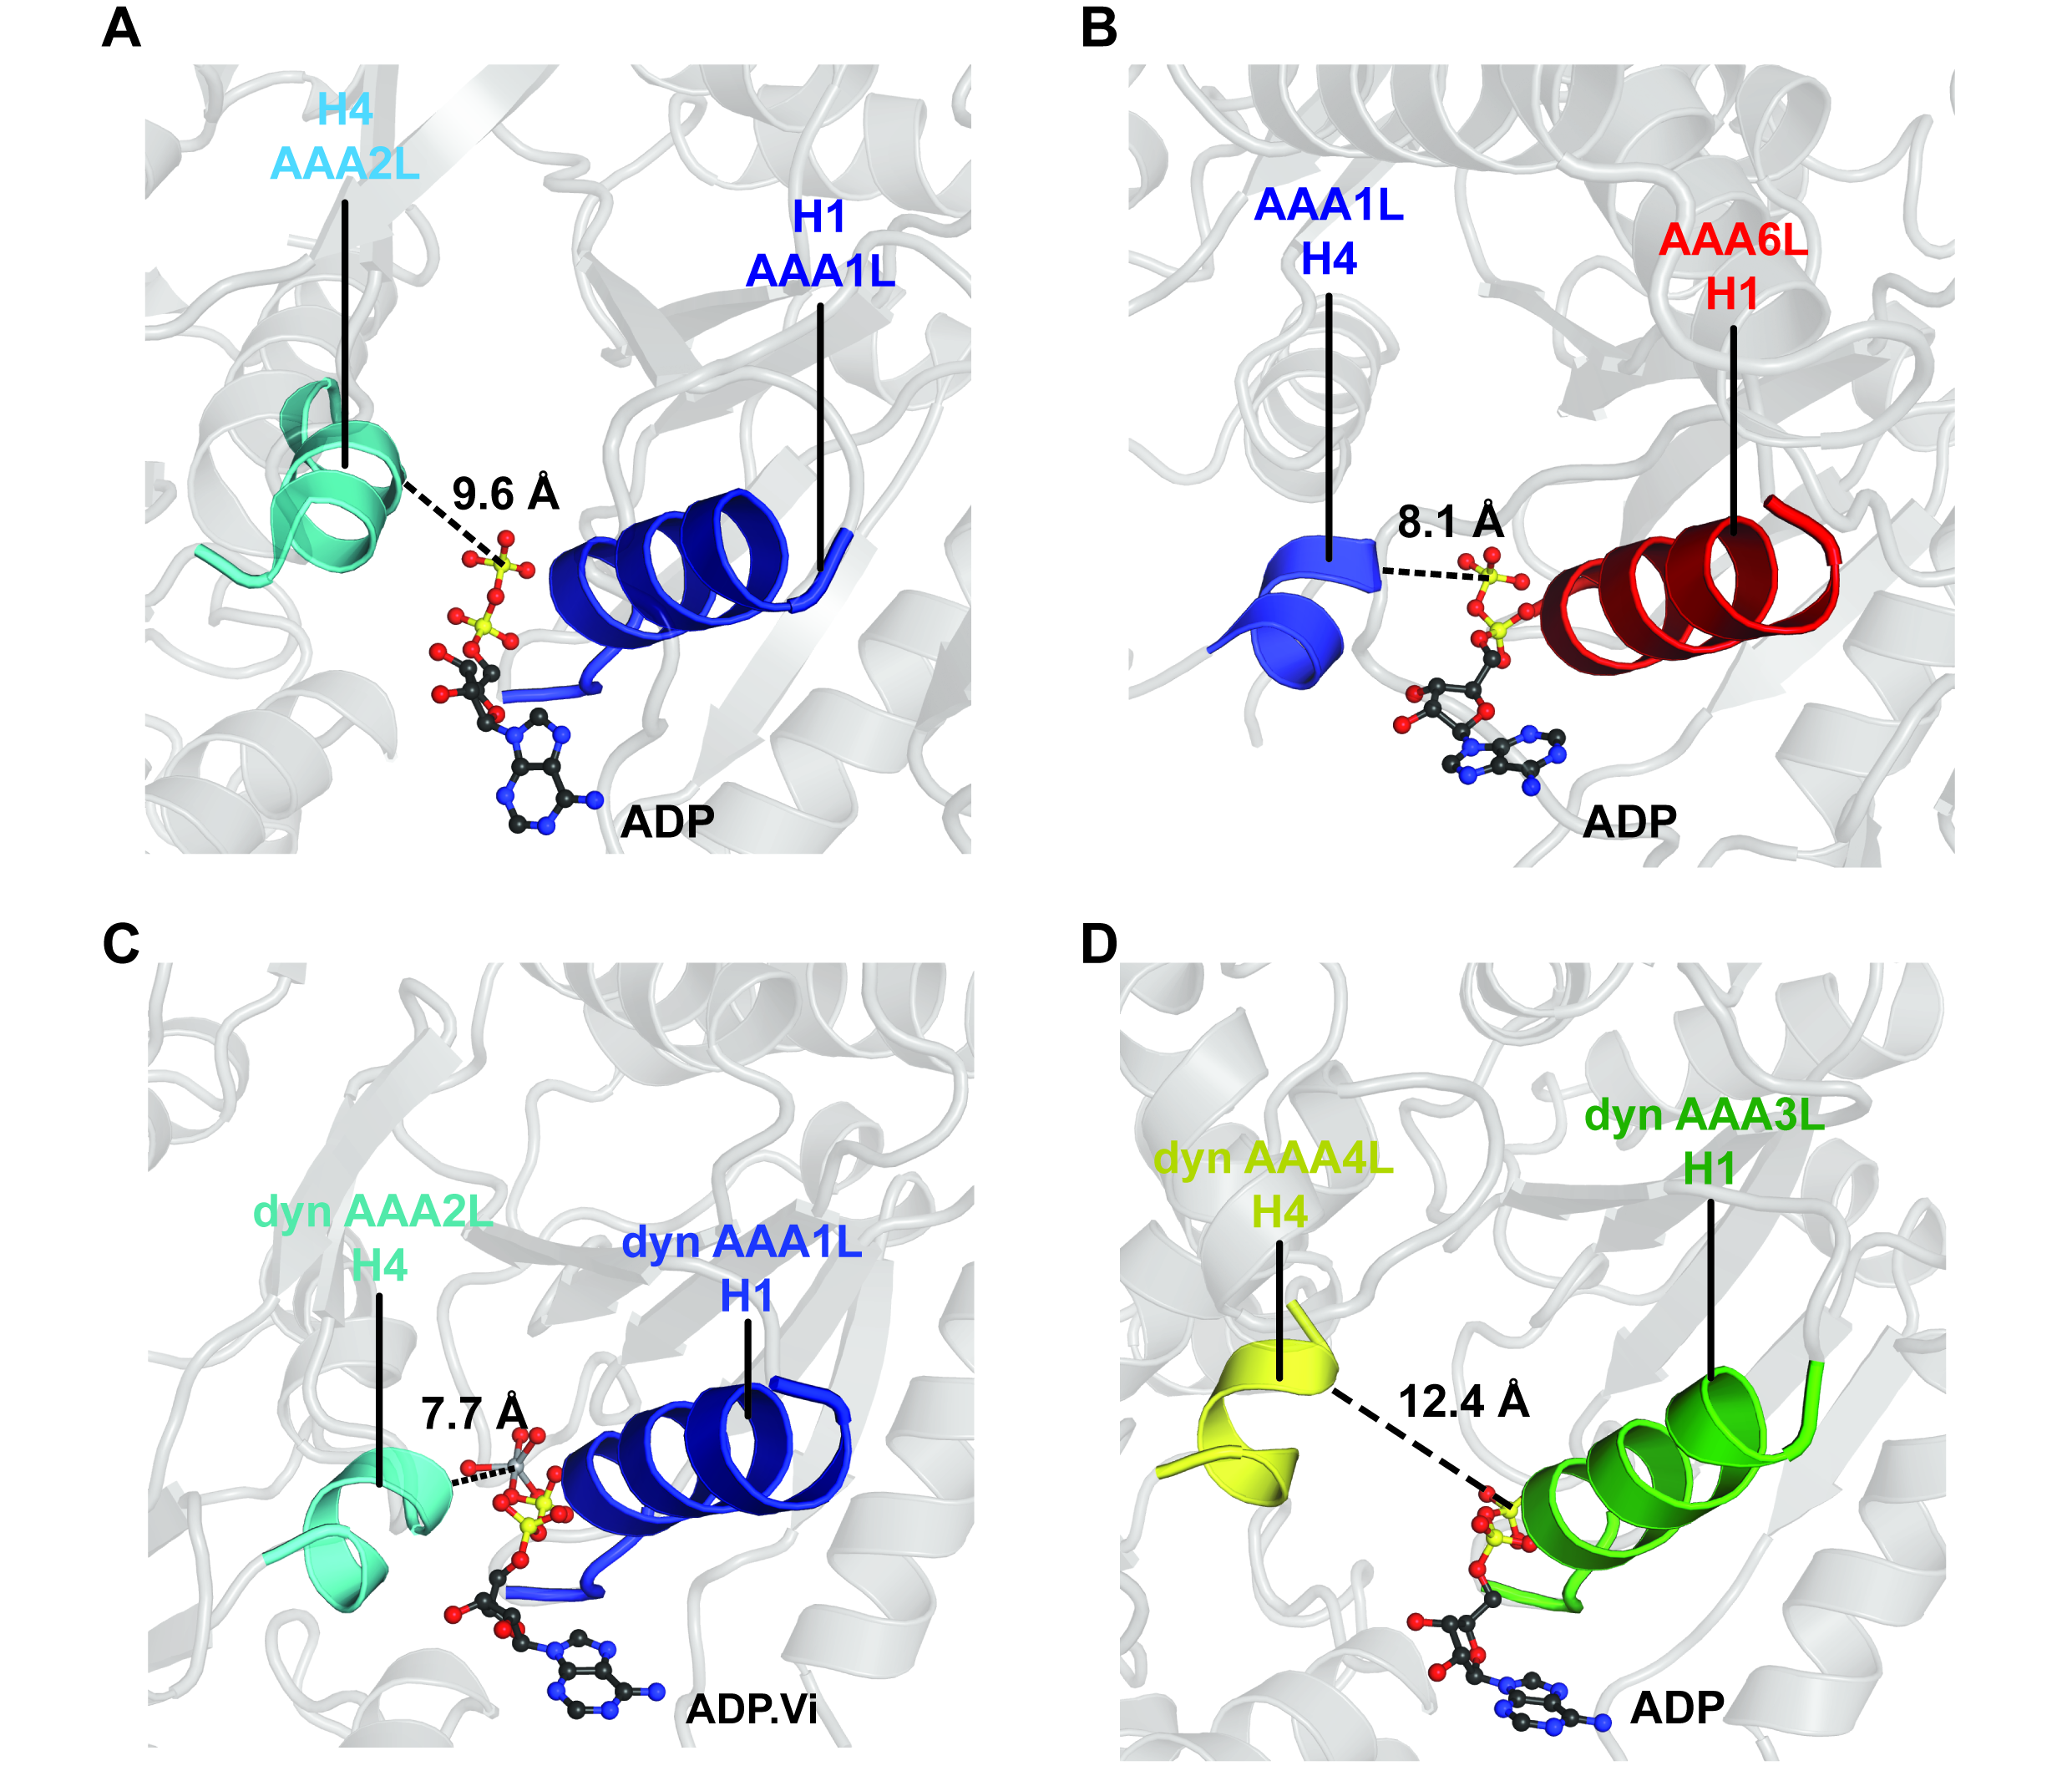

Supplement: supp [file elife-39163-supp-v1.zip › elife_poa_e39163_Figure_1_figure_supplement_7.tif]

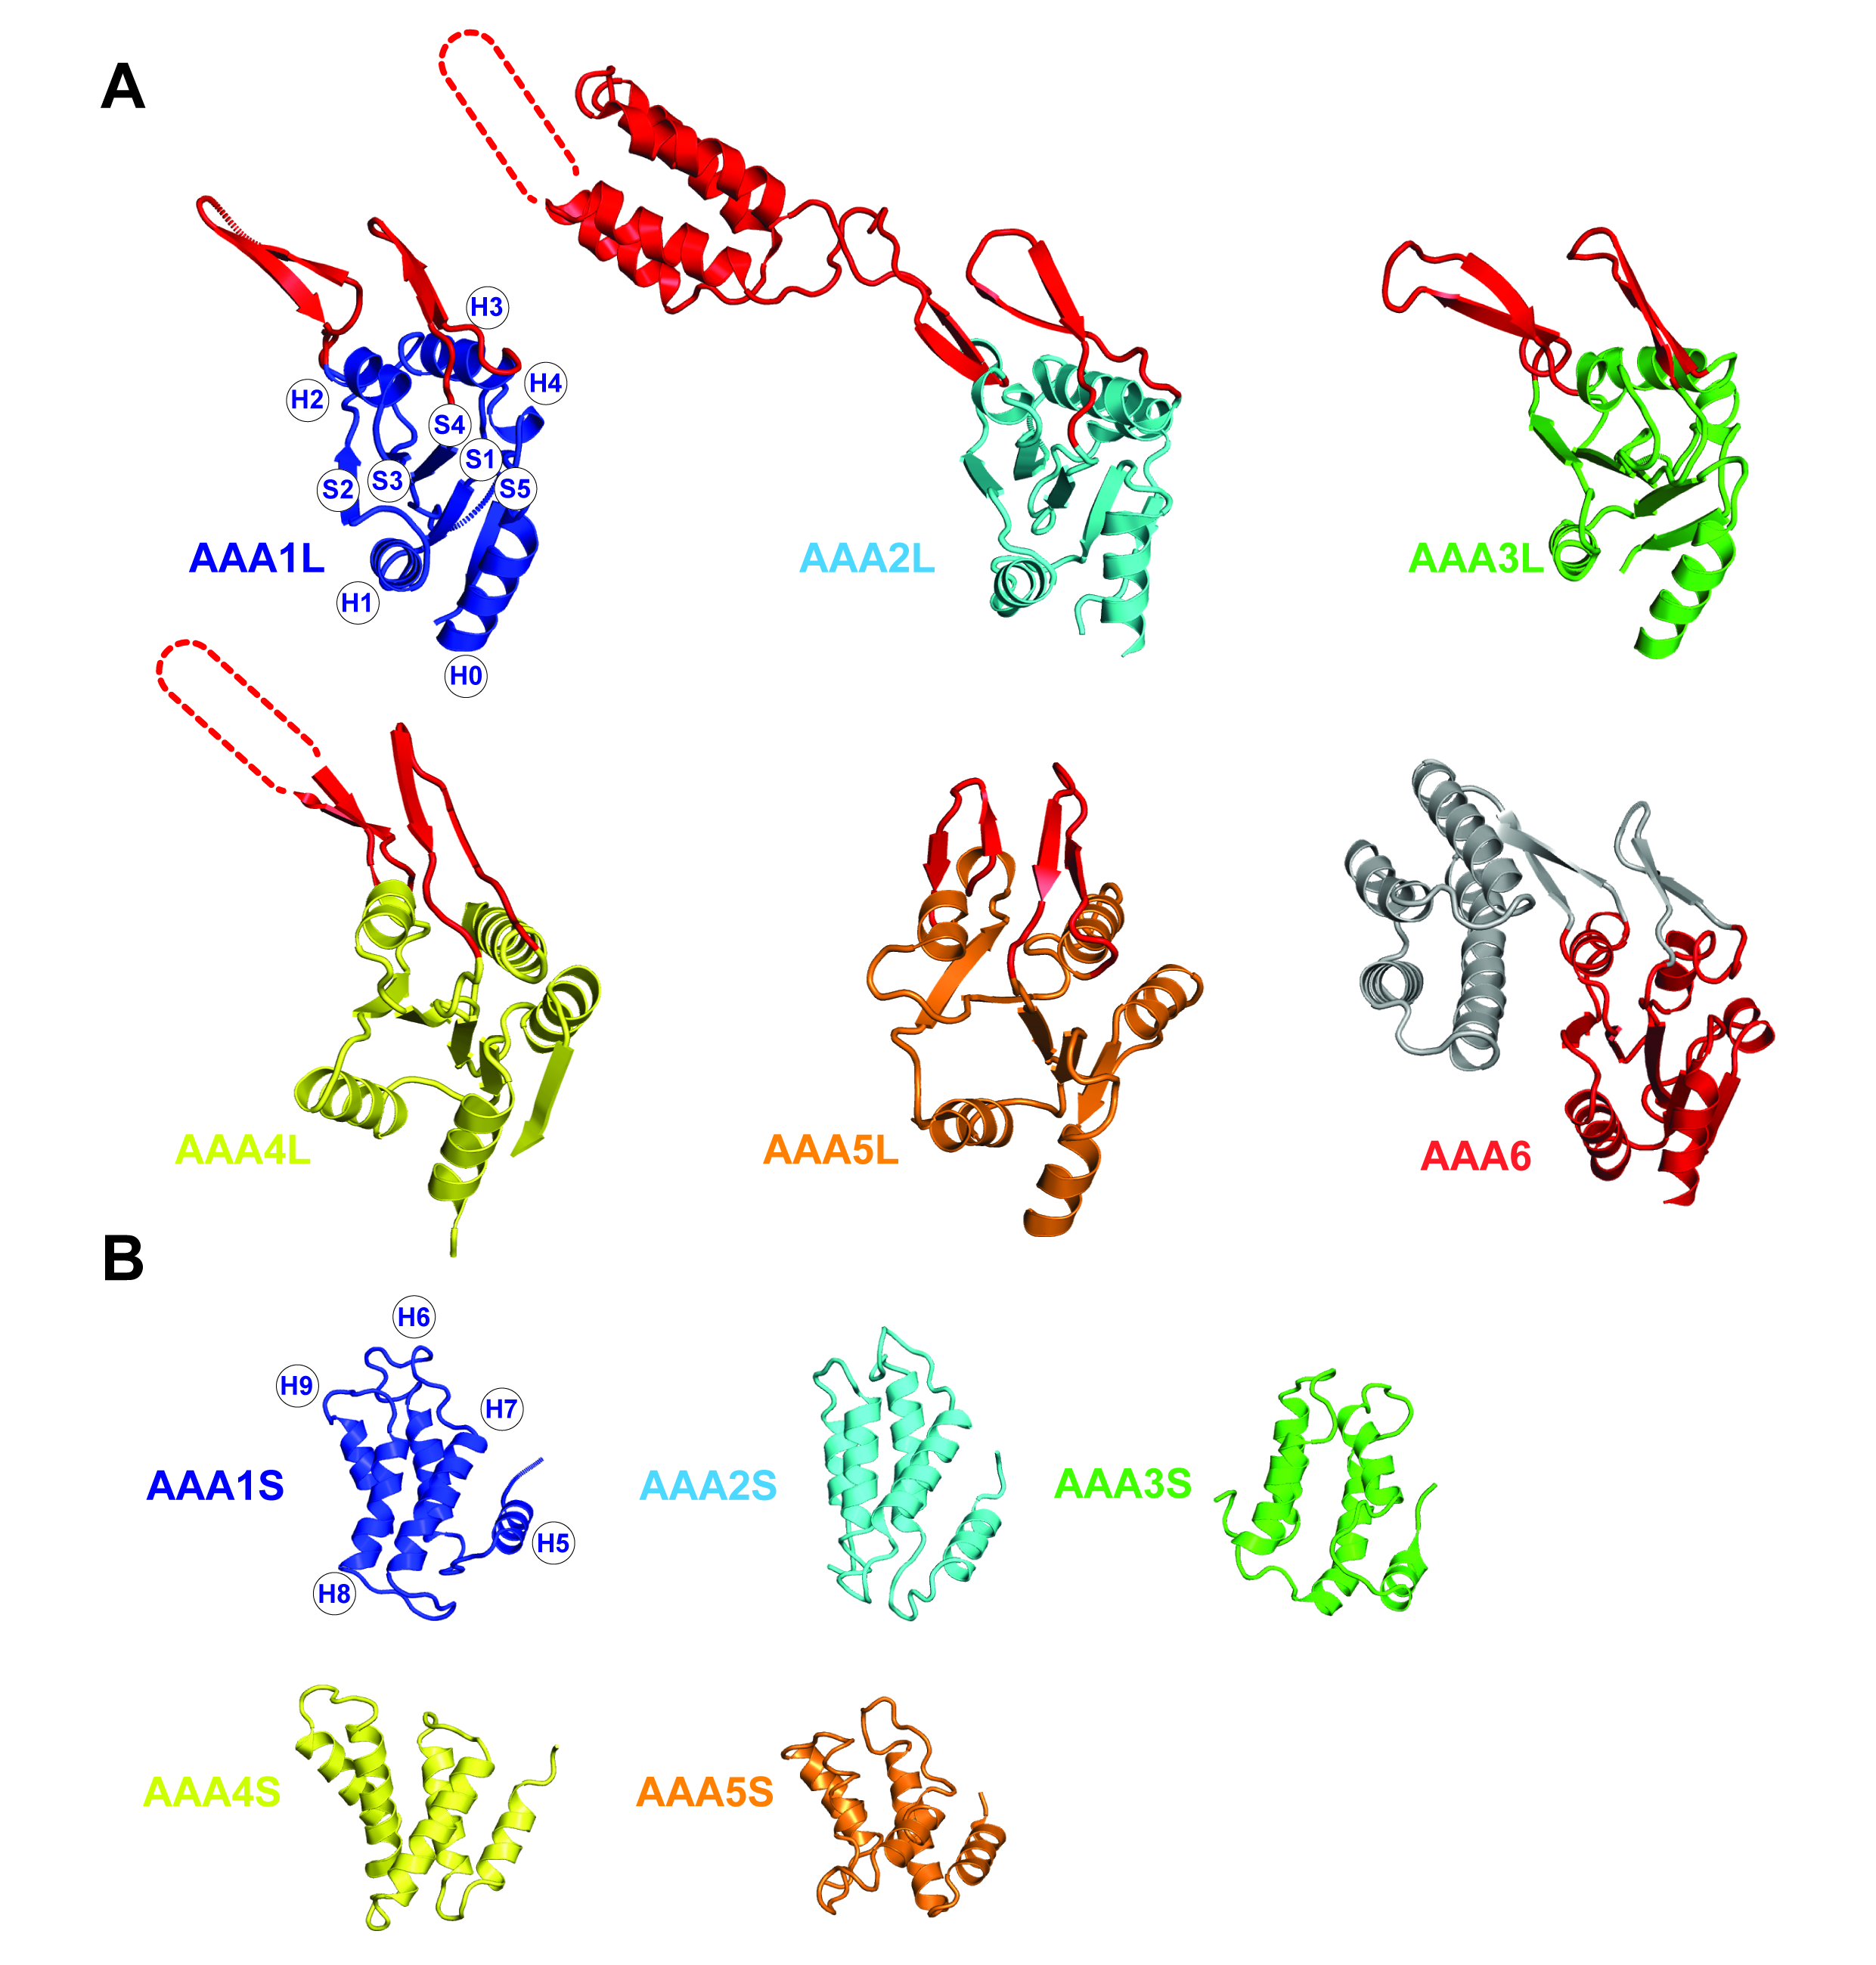

Supplement: supp [file elife-39163-supp-v1.zip › elife_poa_e39163_Figure_1_figure_supplement_4.tif]

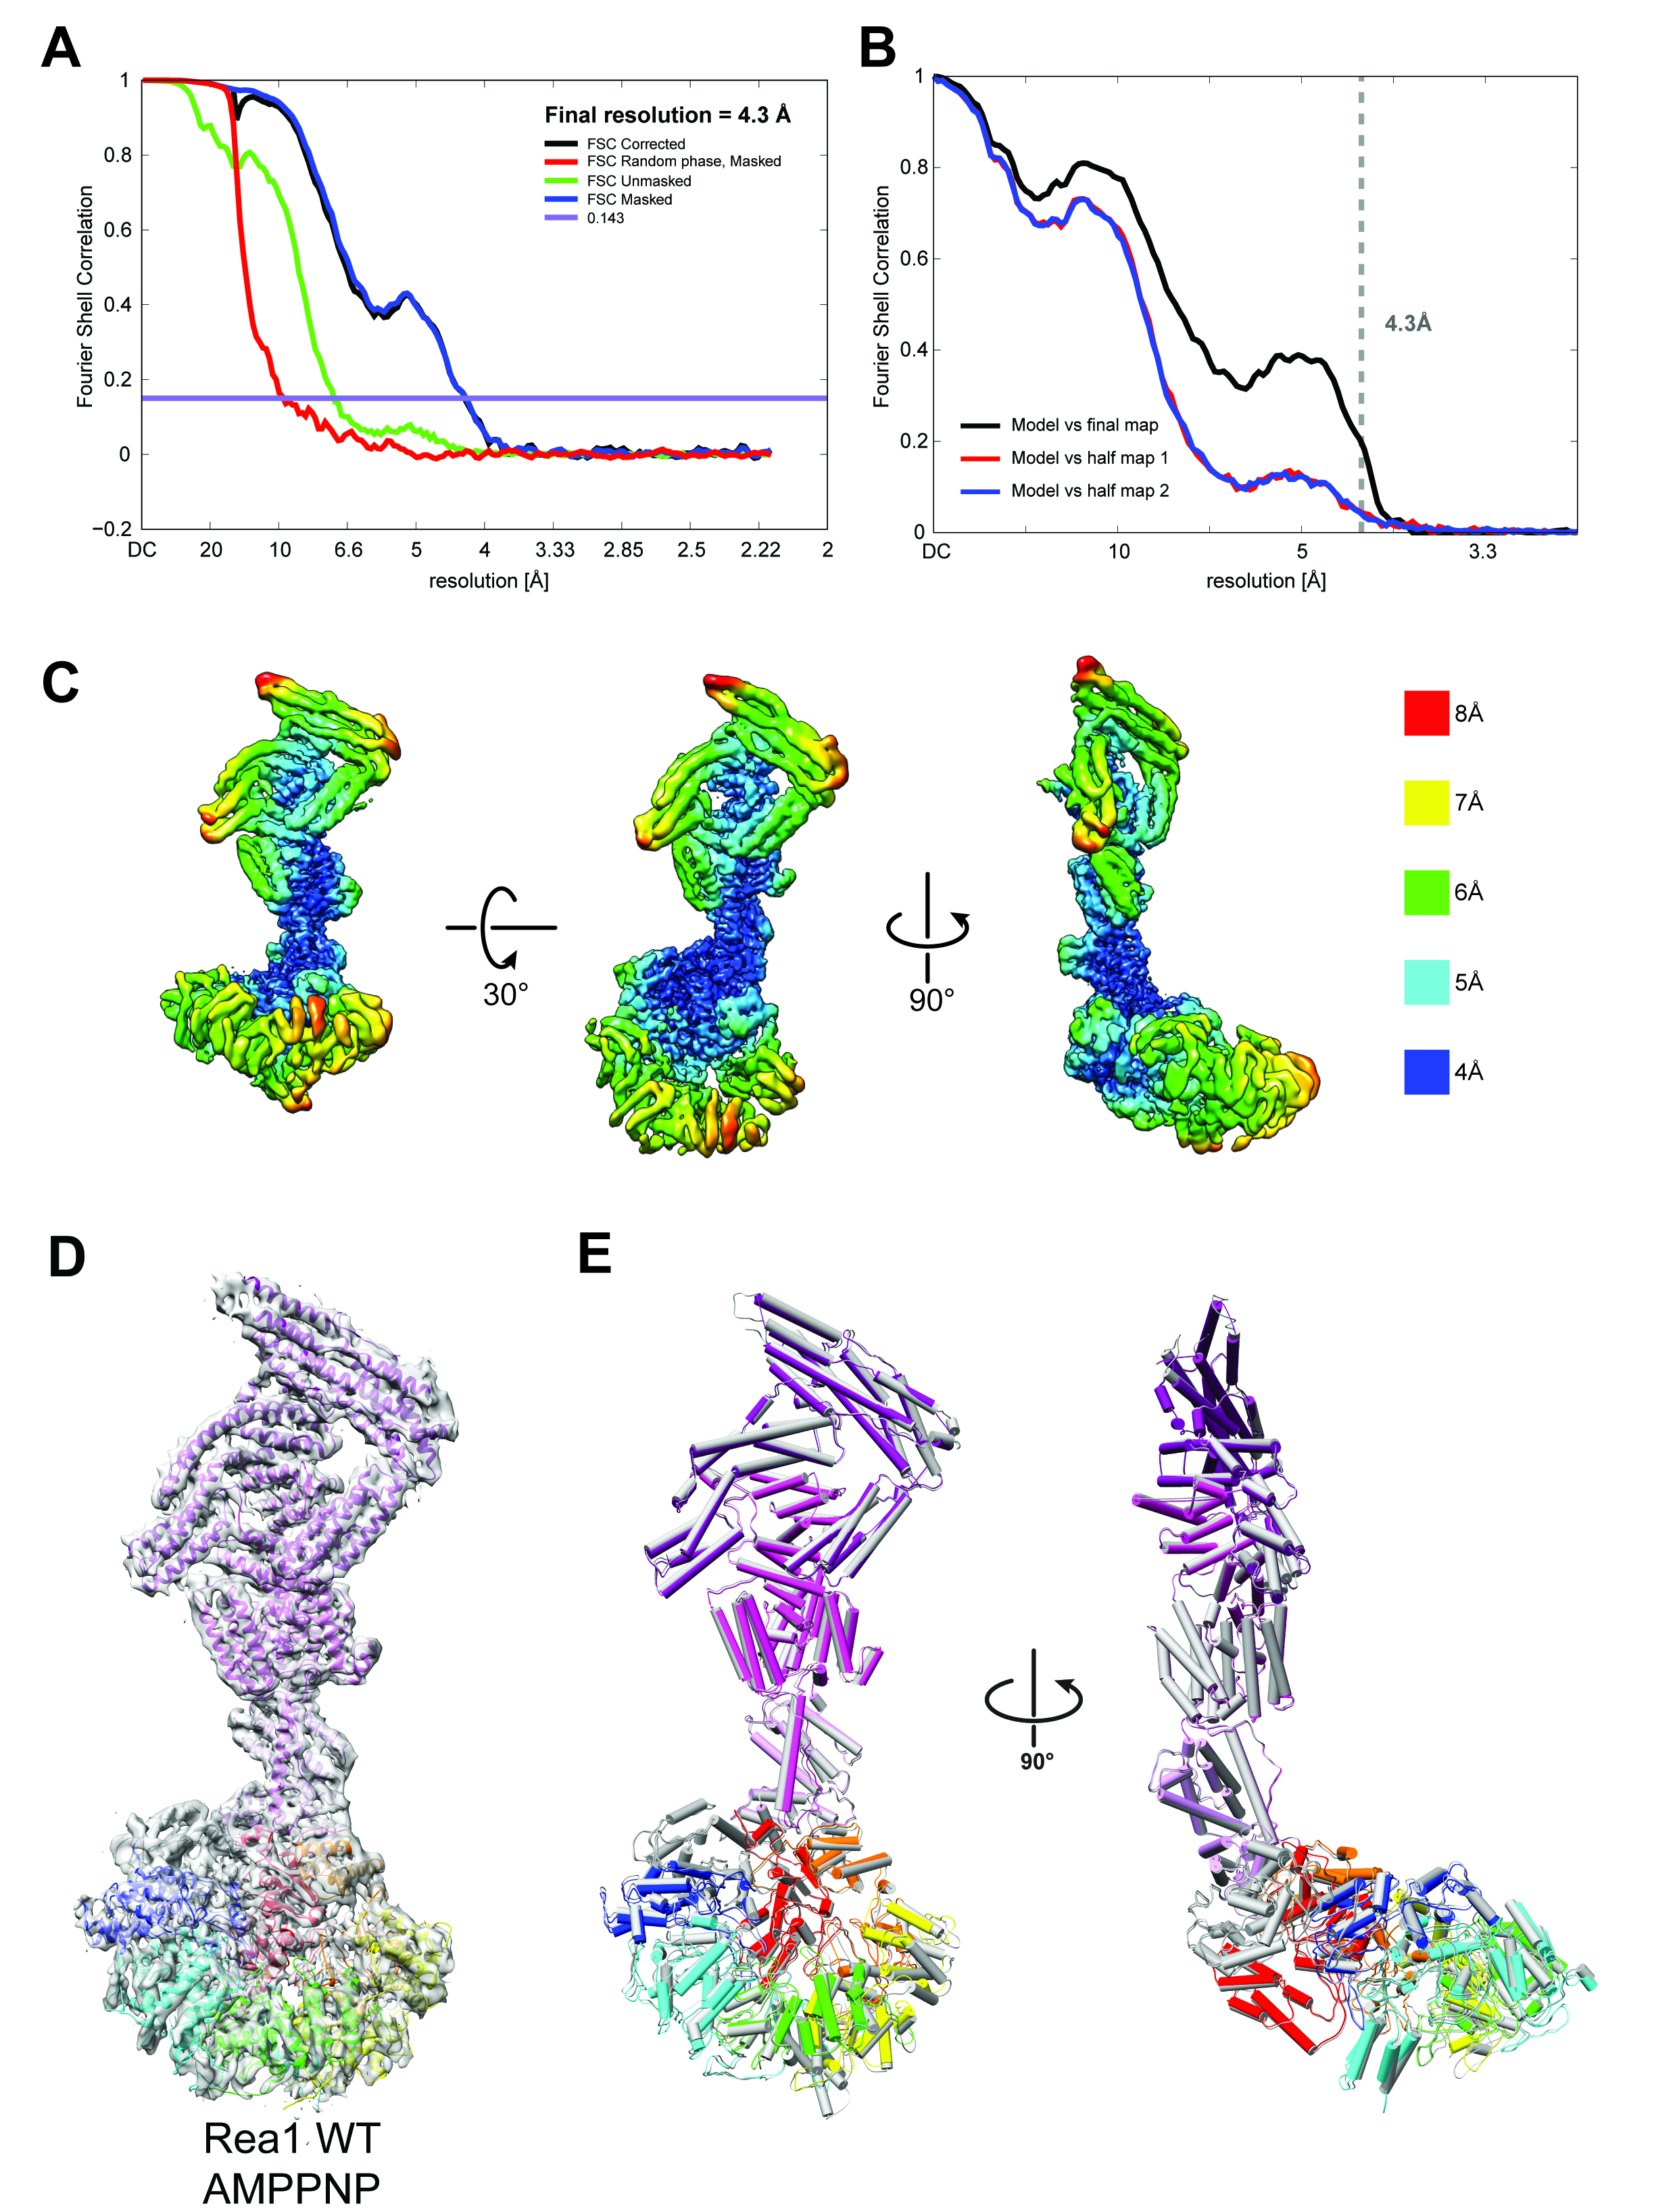

Supplement: supp [file elife-39163-supp-v1.zip › elife_poa_e39163_Figure_4_figure_supplement_1.tif]

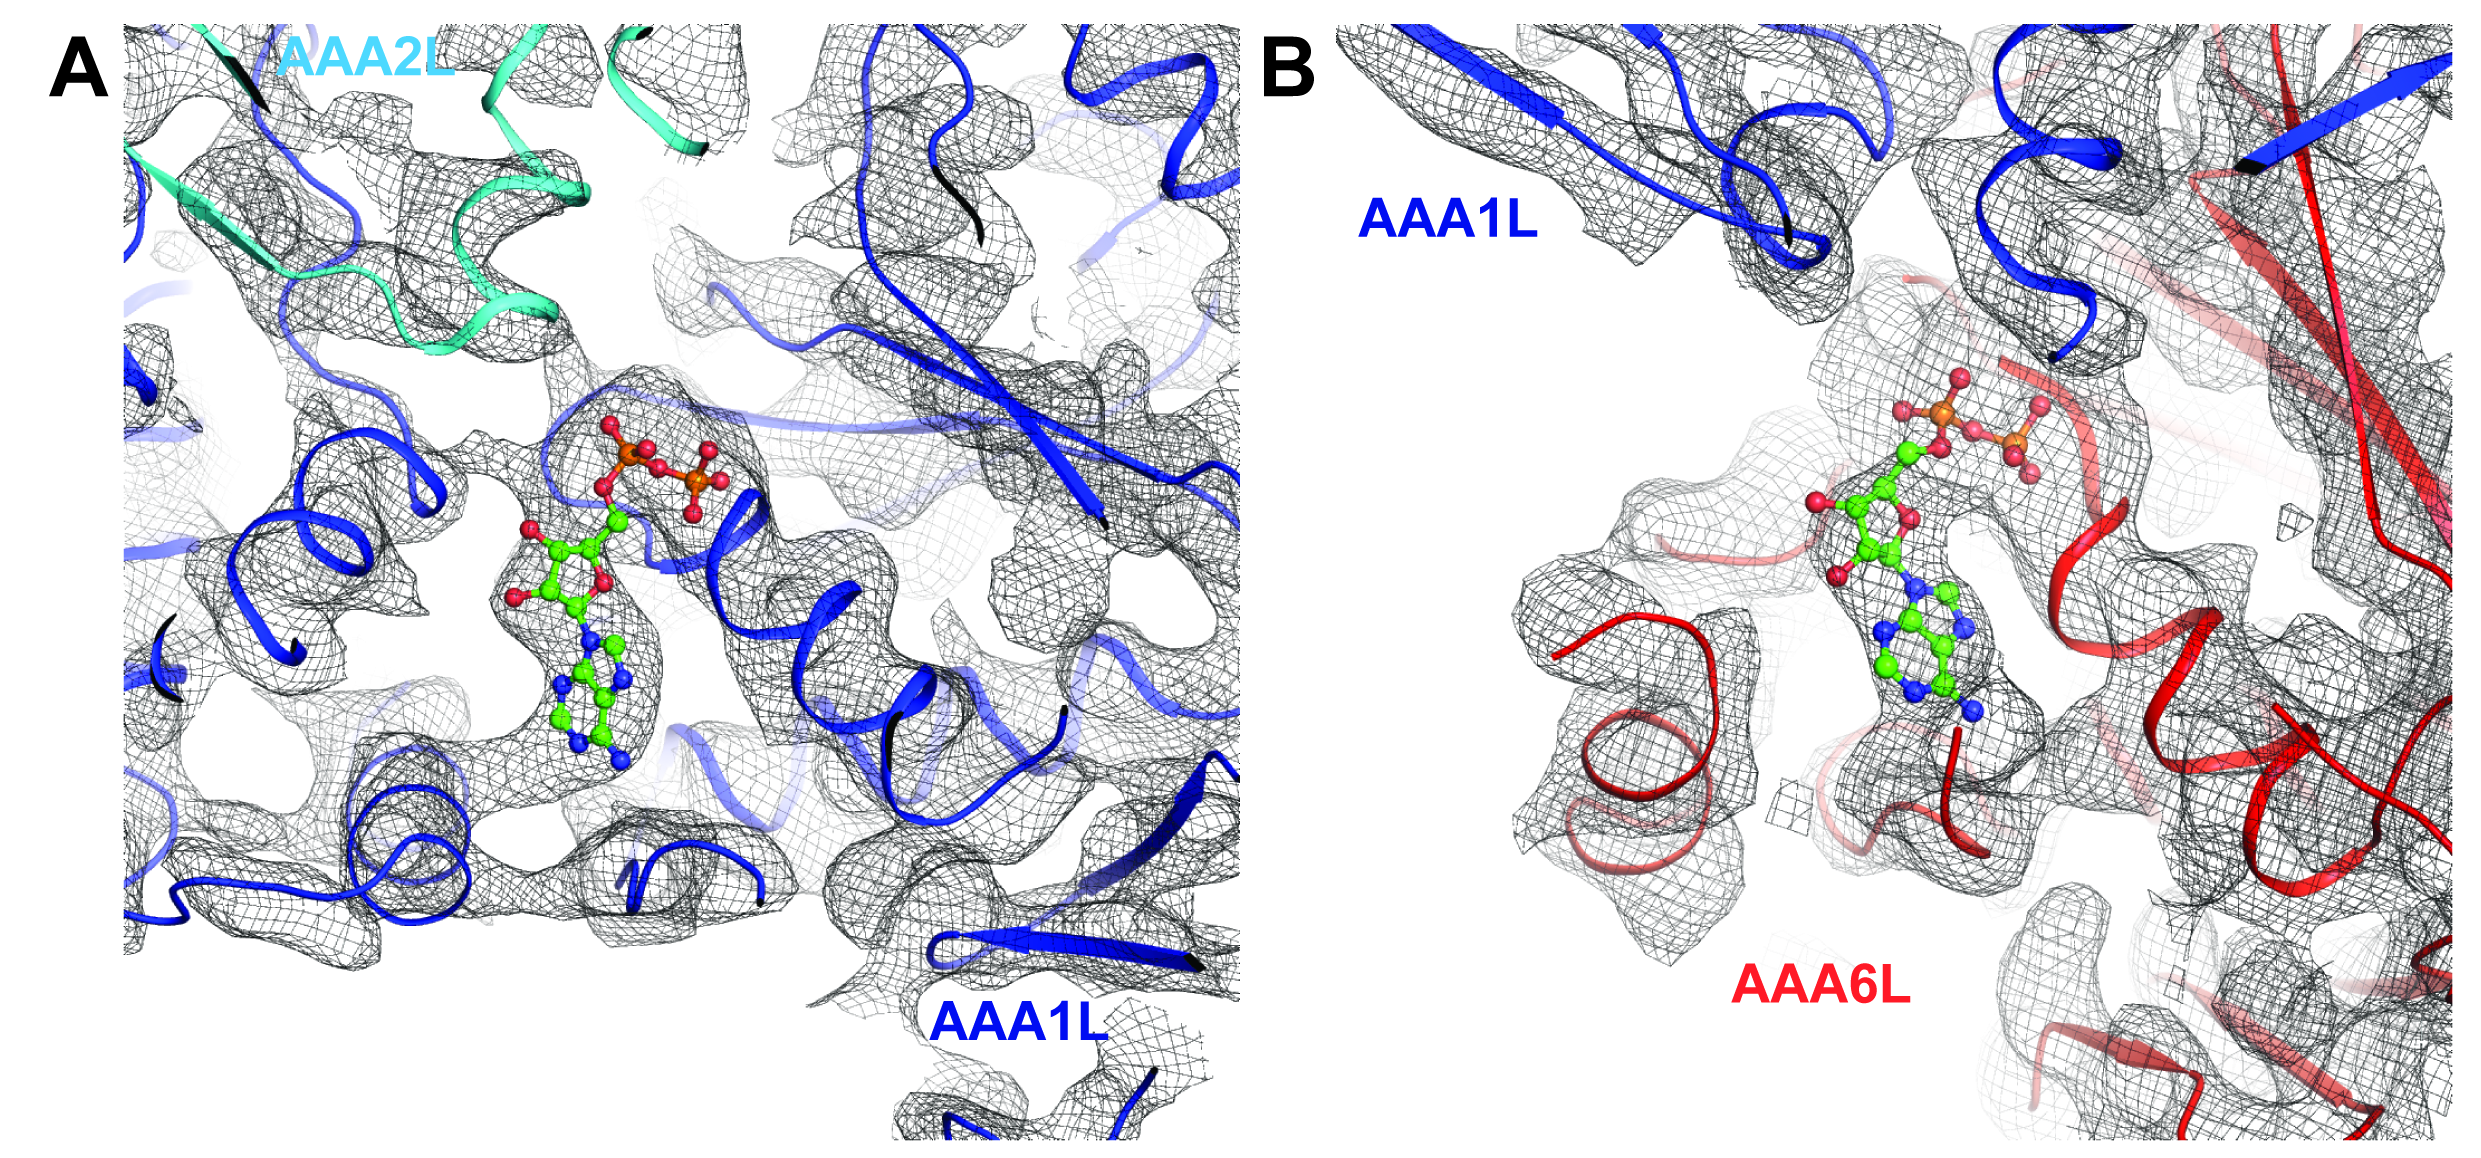

Supplement: supp [file elife-39163-supp-v1.zip › elife_poa_e39163_Figure_1_figure_supplement_6.tif]

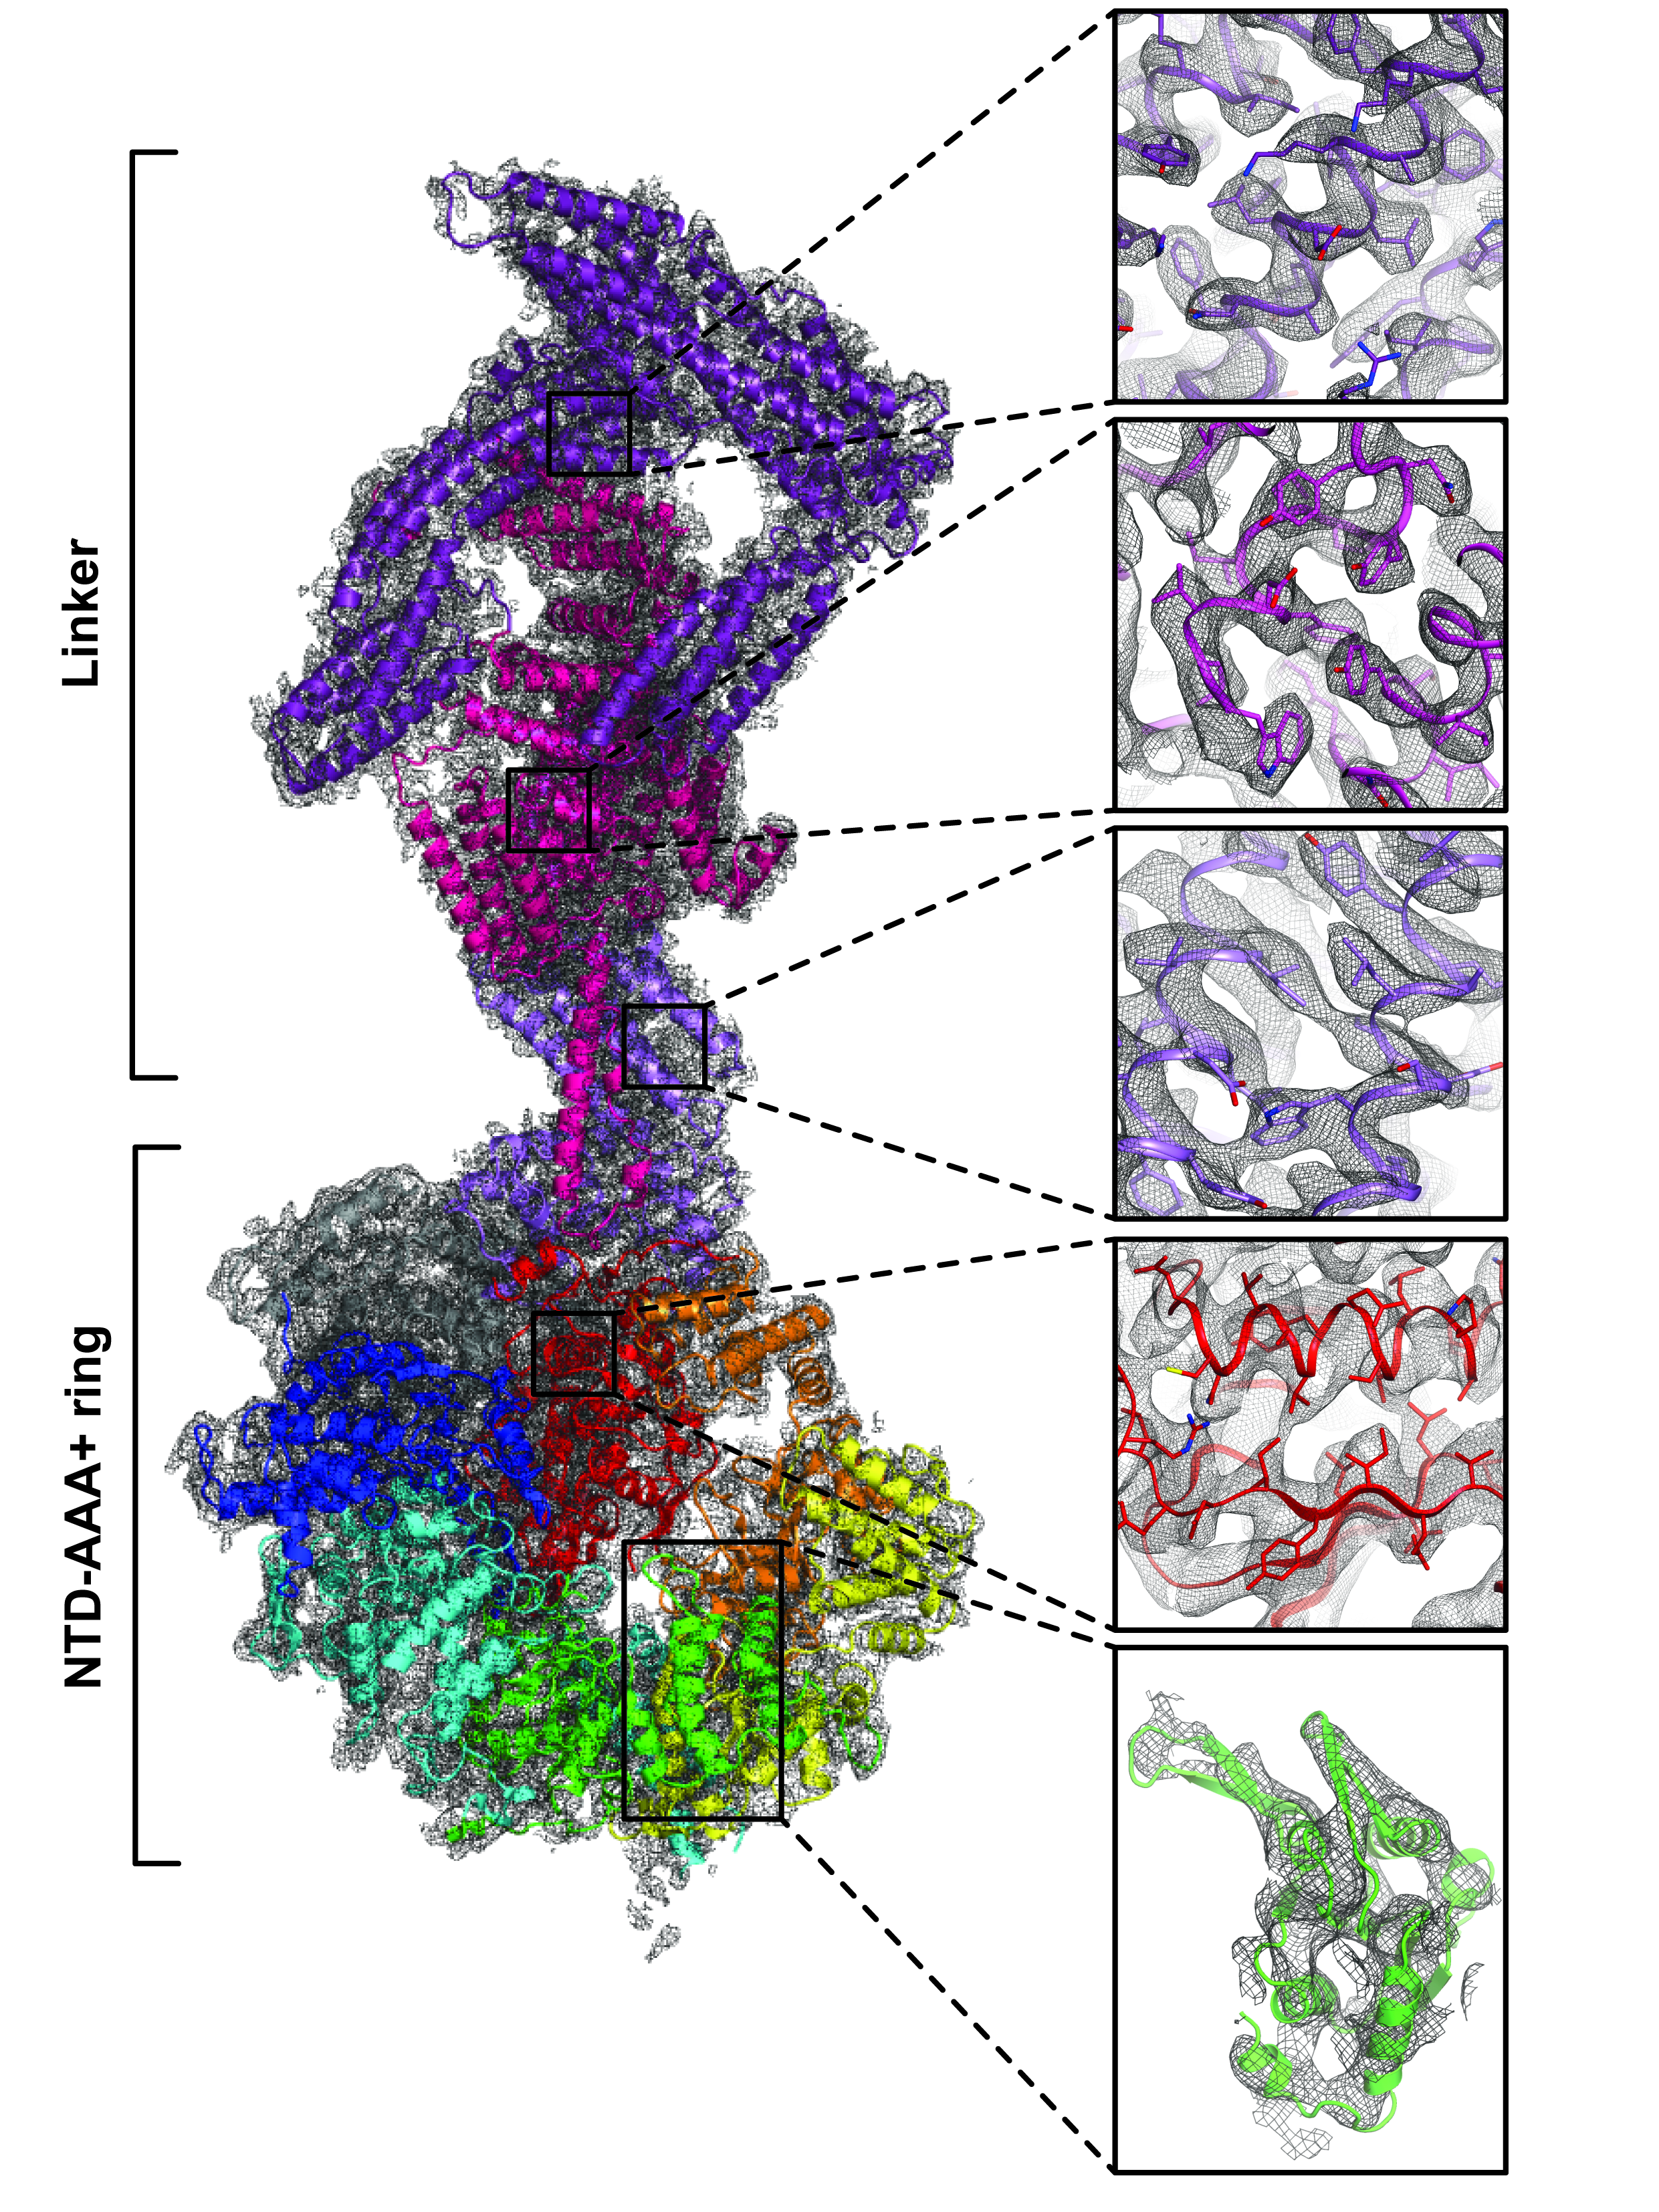

Supplement: supp [file elife-39163-supp-v1.zip › elife_poa_e39163_Figure_1_figure_supplement_2.tif]
